# Supplementary material
Source: ML conference proceedings conference paper supplement (https://openreview.net/forum?id=1tCuRbPts3J)
Supplement: supplementary_material [file attachment]

---

# Do Residual Neural Networks discretize Neural Ordinary Differential Equations?

---

**Michael E. Sander**  
ENS, CNRS  
Paris, France  
michael.sander@ens.fr

**Pierre Ablin**  
Université Paris-Dauphine, CNRS  
Paris, France  
pierreablin@gmail.com

**Gabriel Peyré**  
ENS, CNRS  
Paris, France  
gabriel.peyre@ens.fr

## Abstract

Neural Ordinary Differential Equations (Neural ODEs) are the continuous analog of Residual Neural Networks (ResNets). We investigate whether the discrete dynamics defined by a ResNet are close to the continuous one of a Neural ODE. We first quantify the distance between the ResNet’s hidden state trajectory and the solution of its corresponding Neural ODE. Our bound is tight and, on the negative side, does not go to 0 with depth  $N$  if the residual functions are not smooth with depth. On the positive side, we show that this smoothness is preserved by gradient descent for a ResNet with linear residual functions and small enough initial loss. It ensures an implicit regularization towards a limit Neural ODE at rate  $\frac{1}{N}$ , uniformly with depth and optimization time. As a byproduct of our analysis, we consider the use of a memory-free discrete adjoint method to train a ResNet by recovering the activations on the fly through a backward pass of the network, and show that this method theoretically succeeds at large depth if the residual functions are Lipschitz with the input. We then show that Heun’s method, a second order ODE integration scheme, allows for better gradient estimation with the adjoint method when the residual functions are smooth with depth. We experimentally validate that our adjoint method succeeds at large depth, and that Heun’s method needs fewer layers to succeed. We finally use the adjoint method successfully for fine-tuning very deep ResNets without memory consumption in the residual layers.

## 1 Introduction

**Problem setup.** Residual Neural Networks (ResNets) [20, 21] keep on outperforming state of the art in computer vision [46, 6], and more generally skip connections are widely used in a various range of applications [42, 14]. A ResNet of depth  $N$  iterates, starting from  $x_0 \in \mathbb{R}^d$ ,  $x_{n+1} = x_n + f(x_n, \theta_n^N)$  and outputs a final value  $x_N \in \mathbb{R}^d$  where  $f$  is a neural network called residual function. In this work, we consider a simple modification of this forward rule by letting explicitly the residual mapping depend on the depth of the network:

$$x_{n+1} = x_n + \frac{1}{N}f(x_n, \theta_n^N). \quad (1)$$

On the other hand, a Neural ODE [8] uses a neural network  $\varphi_\Theta(x, s)$ , that takes time  $s$  into account, to parameterise a vector field [24] in a differential equation, as follows,

$$\frac{dx}{ds} = \varphi_\Theta(x(s), s) \quad \text{with} \quad x(0) = x_0, \quad (2)$$

and outputs a final value  $x(1) \in \mathbb{R}^d$ , the solution of Eq.(2). The Neural ODE framework enables learning without storing activations (the  $x_n$ ’s) using the adjoint state method, hence significantly reducing the memory usage for backpropagation that can be a bottleneck during training [43, 34, 48, 16].

Neural ODEs also provide a theoretical framework to study deep learning models from the continuous viewpoint, using the arsenal of ODE theory [40, 25, 41]. Importantly, they can also be seen as the continuous analog of ResNets. Indeed, consider for  $N$  an integer, the Euler scheme for solving Eq. (2) with time step  $\frac{1}{N}$  starting from  $x_0$  and iterating  $x_{n+1} = x_n + \frac{1}{N}\varphi_{\Theta}(x_n, \frac{n}{N})$ . Under mild assumptions on  $\varphi_{\Theta}$ , this scheme is known to converge to the true solution of Eq. (2) as  $N$  goes to  $+\infty$ . Also, if  $\Theta = (\theta_n^N)_{i \in [N-1]}$  and  $\varphi_{\Theta}(\cdot, \frac{n}{N}) = f(\cdot, \theta_n^N)$ , then the ResNet equation Eq. (1) corresponds to a Euler discretization with time step  $\frac{1}{N}$  of Eq. (2). However, for a given ResNet with fixed depth  $N$  and weights, the activations in Eq. (1) can be far from the solution of Eq. (2). This is illustrated in Figure 1 where we show that a deep ResNet can easily break the topology of the input space, which is impossible for a Neural ODE. In this paper, we study the link between ResNets and Neural ODEs. We make the following contributions:

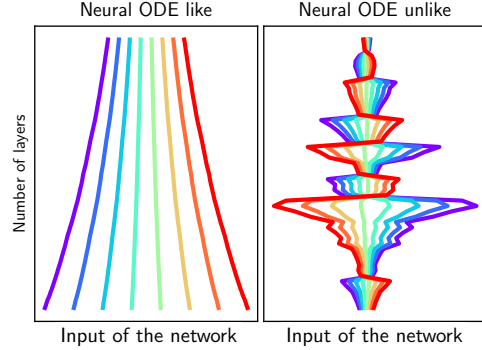

Figure 1: **Trajectory of ResNets with 300 layers.** Left: we learn  $x \rightarrow \frac{x^2}{2}$ , trajectories are smooth and do not intersect. Right: we learn  $x \rightarrow \frac{-x^2}{2}$ , trajectories are not smooth and intersect.

- In Section 3, we propose a framework to define a set of associated Neural ODEs for a given ResNet. We control the error between the discrete and the continuous trajectory. We show that without additional assumptions on the smoothness with depth of the residual functions, this error does not go to 0 as  $N \rightarrow \infty$  (Prop. 1). However, we show that under some assumptions on the weight initialization, the trained parameters of a deep linear ResNet uniformly (with respect to both depth and training time) approach a Lipschitz function as the depth  $N$  of the network goes to infinity, at speed  $\frac{1}{N}$  (Prop. 2 and Th. 1). This result highlights an implicit regularization towards a limit Neural ODE.
- In Section 4, we investigate a simple technique to train ResNets without storing activations. Inspired by the adjoint method, we propose to recover the approximated activations during the backward pass by using a reverse-time Euler scheme. We control the error for recovering the activations and gradients with this method. We show that if the residuals of the ResNet are bounded and Lipschitz continuous, with constants independent of  $N$ , then this error scales in  $O(\frac{1}{N})$  (Prop. 3). Hence, the adjoint method needs a large number of layers to lead to correct gradients (Prop. 4). We then consider a smoothness-dependent reconstruction with Heun’s method to bound the error between the true and approximated gradient by a term that depends on  $\frac{1}{N}$  times the smoothness in depth of the residual functions, hence guaranteeing a better approximation when successive weights are close one to another (Prop. 5 and 6).
- In Section 5, on the experimental side, we show that the adjoint method fails when training a ResNet 101 on ImageNet. Nevertheless, we empirically show that very deep ResNets pretrained with tied weights (constant weights:  $\theta_n^N = \theta \forall n$ ) can be refined -using our adjoint method- on CIFAR-10 and ImageNet by untying their weights, leading to a better test accuracy. Last, but not least, we show using a ResNet architecture with heavy downsampling in the first layer that our adjoint method succeeds at large depth and that Heun’s method leads to a better behaved training, hence confirming our theoretical results.

## 2 Background and related work

**Neural ODEs.** Neural ODEs are a class of implicit deep learning models defined by an ODE where a neural network parameterises the vector field [44, 8, 40, 39, 45, 29, 36, 24]. Given an input  $x_0$ , the output of the model is the solution of the ODE (2) at time 1. From a theoretical viewpoint, the expression capabilities of Neural ODEs have been investigated in [12, 41, 25] and the Neural ODE framework has been used to better understand the dynamics of more general architectures that include residual connections such as Transformers [38, 27]. Experimentally, Neural ODEs have been successful in a various range of applications, among which physical modelling [18, 11] and generative modeling [8, 17]. However, there are many areas where Neural ODEs have failed to replace ResNets, for instance for building computer vision classification models. Neural ODEs fail to compete with

ResNets on ImageNet, and to the best of our knowledge, previous works using Neural ODEs on ImageNet consider weight-tied architectures and only achieves the same accuracy as a ResNet18 [50]. It has also been shown that Neural ODEs sometimes do not admit a continuous interpretation at all [32].

**Implicit Regularization of ResNets towards ODEs.** Recent works have studied the link between ResNets and Neural ODEs. In [9], the authors carry experiments to better understand the scaling behavior of weights in ResNets as a function of the depth. They show that under the assumption that there exists a scaling limit  $\theta(s) = N^\beta \lim \theta_{[Ns]}^N$  for the weights of the ResNets (with  $0 < \beta < 1$ ) and if the scale of the ResNet is  $\frac{1}{N^\alpha}$  with  $0 < \alpha < 1$  and  $\alpha + \beta = 1$ , then the hidden state of the ResNet converges to a solution of a linear ODE. In this paper, we are interested in the case where  $\alpha = 1$ , which seems more natural since it is the scaling that appears in Euler’s method with step  $\frac{1}{N}$ . In addition, we do not assume the existence of a scaling limit  $\theta(s) = \lim \theta_{[Ns]}^N$ . In subsection 3.2, we demonstrate the existence of this scaling limit in the linear setting, under some assumptions. The recent work [10] shows results regarding linear convergence of gradient descent in ResNets and prove the existence of an  $\frac{1}{2}$ -Hölder continuous scaling limit as  $N \rightarrow \infty$  with a scaling factor for the residuals in  $\frac{1}{\sqrt{N}}$  which is different from ours ( $\frac{1}{N}$ ). In contrast, we show that our limit function is Lipschitz continuous, which is a stronger regularity. This is to be linked with the recent work of [31], where the authors show that whereas the  $\frac{1}{\sqrt{N}}$  scaling corresponds to the proper one for standard i.i.d. initializations,  $\frac{1}{N}$  is the proper scaling for smooth initialization to obtain non-trivial behaviour (other choices lead to explosion or to identity [31]). More generally, recent works have proved the convergence of gradient descent training of ResNet when the initial loss is small enough. This include ResNet with finite width but arbitrary large depth [15, 26] and ResNet with both infinite width and depth [28, 3]. These convergence proofs leverage an implicit bias toward weights with small amplitudes. They however leave open the question of convergence of individual weights as depth increases, which we tackle in this work in the linear case. This requires showing an extra bias toward weights with small variations across depth.

**Memory bottleneck in ResNets.** Training deep learning models involve graphics processing units (GPUs) where memory is a practical bottleneck [43, 34, 48]. Indeed, backpropagation requires to store activations at each layer during the forward pass. Since samples are processed using mini batches, this storage can be important. For instance, with batches of size 128, the memory needed to compute gradients for a ResNet 152 on ImageNet is about 22 GiB. Note that the memory needed to store the parameters of the model is only 220 MiB, which is negligible compared to the memory needed to store the activations. Thus, designing deep invertible architectures where one can recover the activations on the fly during the backpropagation iterations has been an active field in recent years [16, 37, 23]. In this work, we propose to approximate activations using a reverse-time Euler scheme, as we detail in the next subsection.

**Adjoint Method.** Consider a loss function  $L(x_N)$  for the ResNet (1). The backpropagation equations [5] are

$$\nabla_{\theta_{n-1}^N} L = \frac{1}{N} [\partial_\theta f(x_{n-1}, \theta_{n-1}^N)]^\top \nabla_{x_n} L, \quad \nabla_{x_{n-1}} L = [I + \frac{1}{N} \partial_x f(x_{n-1}, \theta_{n-1}^N)]^\top \nabla_{x_n} L. \quad (3)$$

Now, consider a loss function  $L(x(1))$  for the Neural ODE (2). The adjoint state method [35, 8] gives

$$\nabla_{\Theta} L = - \int_T^0 \partial_\Theta [\varphi_\Theta(x(s), s)]^\top \nabla_{x(s)} L ds, \quad -\dot{\nabla}_{x(s)} L(s) = [\partial_x \varphi_\Theta(x(s), s)]^\top \nabla_{x(s)} L. \quad (4)$$

Note that if  $\Theta = (\theta_n^N)_{n \in [N-1]}$  and  $\varphi_\Theta(\cdot, \frac{n}{N}) = f(\cdot, \theta_n^N)$ , then Eq. (3) corresponds to a Euler discretization with time step  $\frac{1}{N}$  of Eq. (4). The key advantage of using Eq. (4) is that one can recover  $x(s)$  on the fly by solving the Neural ODE (2) backward in time starting from  $x(1)$ . This strategy avoids storing the forward trajectory  $(x(s))_{s \in [0,1]}$  and leads to a  $O(1)$  memory footprint [8]. In this work, we propose to use a discrete adjoint method by using a reverse-time Euler scheme for approximately recovering the activations in a ResNet (Section 4). Contrarily to other models such as RevNets [16] (architecture change) or Momentum ResNets [37] (forward rule modification) which rely on an exactly invertible forward rule, the proposed method requires no change at all in the network, but gives approximate gradients.

**Notations.** For  $k \in \mathbb{N}$ ,  $\mathcal{C}^k$  is the set of functions  $f : \mathbb{R}^d \rightarrow \mathbb{R}^d$   $k$  times differentiable with continuous  $k^{\text{th}}$  differential. If  $f \in \mathcal{C}^1$ ,  $\partial_x f(x)[y]$  is the differential of  $f$  at  $x$  evaluated in  $y$ . For  $K \subset \mathbb{R}^d$  compact,  $\|\cdot\|$  a norm and  $f$  a continuous function on  $\mathbb{R}^d$ , we denote  $\|f\|_\infty^K = \sup_{x \in K} \|f(x)\|$ .

### 3 ResNets as discretization of Neural ODEs

In this section we first show that without further assumptions, the distance between the discrete trajectory and the solution of associated ODEs can be constant with respect to the depth of the network if the residual functions lack smoothness with depth. We then present a positive result by studying the linear case where we show that, under some hypothesis (small loss initialization and initial smoothness with depth), the ResNet converges to a Neural ODE as the number of layers goes to infinity. We show that this convergence is uniform with depth and optimization time.

#### 3.1 Distance to an ODE

We first define associated Neural ODEs for a given ResNet.

**Definition 1.** We say that a neural network  $\varphi_\Theta : \mathbb{R}^d \times \mathbb{R} \rightarrow \mathbb{R}^d$  smoothly interpolates the ResNet Eq. (1). if  $\varphi_\Theta$  is smooth and  $\forall n \in \{0, \dots, N-1\}$ ,  $\varphi_\Theta(\cdot, \frac{n}{N}) = f(\cdot, \theta_n^N)$ .

Note that we omit the dependency of  $\Theta$  in  $N$  to simplify notations. For example, for a given ResNet, there are two natural ways to interpolate it with a Neural ODE, either by interpolating the *residuals*, or by interpolating the *weights*. Indeed, one can interpolate the residuals with  $\varphi_\Theta(\cdot, s) = (n+1-Ns)f(\cdot, \theta_n^N) + (Ns-n)f(\cdot, \theta_{n+1}^N)$  when  $s \in [\frac{n}{N}, \frac{n+1}{N}]$ , or interpolate the weights with  $\varphi_\Theta(\cdot, s) = f(\cdot, (n+1-Ns)\theta_n^N + (Ns-n)\theta_{n+1}^N)$  for  $s \in [\frac{n}{N}, \frac{n+1}{N}]$ . If  $\theta_n^N = \theta^N$  does not depend on  $n$ , then both interpolations are identical and one can simply consider  $\varphi_\Theta(x, s) = f(x, \theta^N)$ ,  $\forall (x, s)$ .

We now consider any smooth interpolation  $\varphi_\Theta$  for the ResNet (1) and a Euler scheme for the Neural ODE (2) with time step  $\frac{1}{N}$ .

**Proposition 1** (Approximation error). We suppose that  $\varphi_\Theta$  is  $\mathcal{C}^1$ , and  $L$ -Lipschitz with respect to  $x$ , uniformly in  $s$ . Note that this implies that the solution of Eq. (2) is well defined, unique,  $\mathcal{C}^2$ , and that the trajectory is included in some compact  $K \subset \mathbb{R}^d$ . Denote  $C_N := \|\partial_s \varphi_\Theta + \partial_x \varphi_\Theta[\varphi_\Theta]\|_\infty^{K \times [0,1]}$ . Then one has for all  $n$ :  $\|x_n - x(\frac{n}{N})\| \leq \frac{e^L - 1}{2NL} C_N$  if  $L > 0$  and  $\|x_n - x(\frac{n}{N})\| \leq \frac{C_N}{2N}$  if  $L = 0$ .

For a full proof, see appendix A.1. Note that this result extends Theorem 3.2 from [49] to the non-autonomous case: our bound depends on  $\partial_s \varphi_\Theta$ . Finally, our bound is tight. Indeed, for  $\varphi_\Theta(x, s) = as + b$  for  $a, b \in \mathbb{R}^d$ , we get  $\partial_s \varphi_\Theta + \partial_x \varphi_\Theta[\varphi_\Theta] = a$ ,  $L = 0$  and  $\|x(1) - x_N\| = \frac{\|a\|}{2N}$ .

**Implication.** The tightness of our bound shows that closeness to the ODE solution is not guaranteed, because we do not know whether  $C_N/N \rightarrow 0$ . Indeed, consider first the residual interpolation  $\varphi_\Theta(x, s) = ((n+1-Ns)f(x, \theta_n^N) + (Ns-n)f(x, \theta_{n+1}^N))\mathbb{1}_{s \in [\frac{n}{N}, \frac{n+1}{N}]}$  and the simple case where  $\partial_x \varphi_\Theta[\varphi_\Theta] = 0$ . We get  $\partial_s \varphi_\Theta(x, s) = N(f(x, \theta_{n+1}^N) - f(x, \theta_n^N))\mathbb{1}_{s \in [\frac{n}{N}, \frac{n+1}{N}]}$ , which corresponds to the discrete derivative. It means that although there is a  $\frac{1}{N}$  factor in our bound, the time derivative term – without further regularity with depth of the weights, which is at the heart of subsection 3.2 – usually scales with  $N$ :  $\frac{C_N}{N} = O(1)$ . As a first example, consider the simple case where  $f(x, \theta_n^N) = n$ . This gives  $x_N = x_0 + \frac{(N-1)}{2}$  while the integration of the Neural ODE (2) leads to  $x(1) = x_0 + \frac{N}{2}$  because  $\varphi_\Theta(x, s) = Ns$ , so the  $\|x_N - x(1)\| = \frac{1}{2}$  is not small. Intuitively, this shows that weights cannot scale with depth when using the residual interpolation. Now, consider the weight interpolation,  $\theta_n^N = (-1)^n$  and suppose  $f$  is written as  $f(x, \theta) = \theta^2$ . This gives  $\varphi_\Theta(\cdot, s) = (2Ns - (2n+1))^2$  when  $s \in [\frac{n}{N}, \frac{n+1}{N}]$ . Integrating, we get  $x(1) = \frac{1}{3}$  while the output of the ResNet is  $x_N = 1$ . Hence  $\|x_N - x(1)\| = \frac{2}{3}$  is also not small, even though the weights are bounded. Thus, one needs additional regularity assumptions on the weights of the ResNet to obtain a Neural ODE in the large depth limit. Intuitively if the weights are initialized close from one another and they are updated using gradient descent, they should stay close from one another during training, since the gradients in two consecutive layers will be similar, as highlighted in Eq. (3). Indeed, we see that if  $x_n$  and  $x_{n+1}$  are close, then  $\nabla_{x_n} L$  and  $\nabla_{x_{n+1}} L$  are close, and then if  $\theta_n^N$  and  $\theta_{n+1}^N$  are close,  $\nabla_{\theta_n^N} L$  and  $\nabla_{\theta_{n+1}^N} L$  are also close. In subsection 3.2, we formalize this intuition and present a

positive result for ResNets with linear residual functions. More precisely, we show that with proper initialization, the difference between two successive parameters is in  $\frac{1}{N}$  during the entire training. Furthermore, we show that the weights of the network converge to a smooth function, hence defining a limit Neural ODE.

### 3.2 Linear Case

As a further step towards a theoretical understanding of the connections between ResNets and Neural ODEs we investigate the linear setting, where the residual functions are written  $f(x, \theta) = \theta x$  for any  $\theta \in \mathbb{R}^{d \times d}$ . It corresponds to a deep matrix factorization problem [51, 4, 2, 1]. As opposed to these previous works, we study the infinite depth limit of these linear ResNets with a focus on the learned weights. We show that, if the weights are initialized close one to another, then at any training time, the weights stay close one to another (Prop. 2) and importantly, they converge to a smooth function of the continuous depth  $s$  as  $N \rightarrow \infty$  (Th. 1). All the proofs are available in appendix A.

**Setting.** Given a training set  $(x_k, y_k)_{k \in [n]}$  in  $\mathbb{R}^d$ , we solve the regression problem of mapping  $x_k$  to  $y_k$  with a linear ResNet, i.e.  $f(x, \theta) = \theta x$ , of depth  $N$  and parameters  $(\theta_1^N, \dots, \theta_N^N)$ . The ResNet therefore maps  $x_k$  to  $\Pi^N x_k$  where  $\Pi^N := \prod_{n=1}^N (I_d + \frac{\theta_n^N}{N}) = (I_d + \frac{\theta_1^N}{N}) \cdots (I_d + \frac{\theta_N^N}{N})$ . It is trained by minimizing the average errors  $\|\Pi^N x_k - y_k\|_2^2$ , which is equivalent to the deep matrix factorization problem:

$$\operatorname{argmin}_{(\theta_n^N)_{n \in [N-1]}} L(\theta_1^N, \dots, \theta_N^N) := \|\Pi^N - B\|_\Sigma^2, \quad (5)$$

where  $\|A\|_\Sigma^2 = \operatorname{Tr}(A \Sigma A^T)$ ,  $\Sigma$  is the empirical covariance matrix of the data:  $\Sigma := \frac{1}{n} \sum_{k=1}^n x_k x_k^\top$ , and  $B := \frac{1}{n} \sum_{k=1}^n y_k x_k^\top \Sigma^{-1}$ . As is standard, we suppose that  $\Sigma$  is non degenerated. We denote by  $M > 0$  (resp.  $m > 0$ ) its largest (resp. smallest) eigenvalue.

**Gradient.** We denote  $\Pi_{:n}^N := (I_d + \frac{\theta_n^N}{N}) \cdots (I_d + \frac{\theta_{n+1}^N}{N})$  and  $\Pi_n^N := (I_d + \frac{\theta_{n-1}^N}{N}) \cdots (I_d + \frac{\theta_1^N}{N})$  and write the gradient  $\nabla_n^N(t) = \nabla_{\theta_n^N} L(\theta_1^N(t), \dots, \theta_N^N(t))$ . The chain rule gives  $N \nabla_n^N = \Pi_{:n}^{N \top} (\Pi^N - B) \Sigma \Pi_n^N$ . Intuitively, as  $N$  goes to  $+\infty$ , the products  $\Pi^N$ ,  $\Pi_{:n}^N$  and  $\Pi_n^N$  should converge to some limit, hence we see that  $N \nabla_n^N$  scale as 1. Therefore, we train  $\theta_n^N$  by the rescaled gradient flow  $\frac{d\theta_n^N}{dt}(t) = -N \nabla_n^N(t)$  to minimize  $L$  and denote  $\ell^N(t) = L(\theta_1^N(t), \dots, \theta_N^N(t))$ .

**Two continuous variables involved.** Our results involve two continuous variables:  $s \in [0, 1]$  is the depth of the limit network and corresponds to the time variable in the Neural ODE, whereas  $t \in \mathbb{R}_+$  is the gradient flow time variable. As is standard in the analysis of convergence of gradient descent for linear networks, we consider the following assumption:

**Assumption 1.** Suppose that at initialisation one has  $\sqrt{\ell^N(0)} < \frac{m}{4\sqrt{2Me^3}}$  and  $\|\theta_n^N(0)\| \leq \frac{1}{4}$ .

Assumption 1 is the classical assumption in the literature [51, 3] to prove linear convergence of our loss and that the  $\theta_n^N(t)$ 's stay bounded with  $t$ . Note that this bounded norm assumption implies that  $\frac{1}{N} \theta_n^N(0) = O(\frac{1}{N})$ . This is in contrast with classical initialization scales in the *feedforward* case where the initialization only depends on width [19]. However this initialization scale is coherent with those of *ResNets* for which the scale has to depend on depth [47, 31]. In addition, the experimental findings in [9] suggest that the weights in ResNets scale in  $\frac{1}{N^\beta}$  with  $\beta > 0$ .

We now prove an implicit regularization result showing that if at initialization, in addition to assumption 1, the weights are close from one another ( $O(\frac{1}{N})$ ), they will stay at distance  $O(\frac{1}{N})$ : the discrete derivative stay in  $O(\frac{1}{N})$ , which is a central result to consider the infinite depth limit in our Th. 1.

**Proposition 2** (Smoothness in depth of the weights). *Suppose assumption 1. Suppose that there exists  $C_0 > 0$  independent of  $n$  and  $N$  such that  $\|\theta_{n+1}^N(0) - \theta_n^N(0)\| \leq \frac{C_0}{N}$ . Then,  $\forall t \in \mathbb{R}_+$ ,  $\|\theta_n^N(t)\| < \frac{1}{2}$ , and  $\theta_n^N(t)$  admits a limit  $\psi_n^N$  as  $t \rightarrow +\infty$ . Moreover, there exists  $C > 0$  such that  $\forall t \in \mathbb{R}_+$ ,  $\|\theta_{n+1}^N(t) - \theta_n^N(t)\| \leq \frac{C}{N}$ .*

For a full proof, see appendix A.2. The inequality  $\|\theta_{n+1}^N(t) - \theta_n^N(t)\| \leq \frac{C}{N}$  corresponds to a discrete Lipschitz property in depth. Indeed, for  $s \in [0, 1]$  and  $t \in \mathbb{R}_+$ , let  $\psi_N(s, t) = \theta_{\lfloor Ns \rfloor}^N(t)$ . Then

our result gives  $\|\psi_N(\frac{n+1}{N}, t) - \psi_N(\frac{n}{N}, t)\| \leq \frac{C}{N}$  which implies that  $\|\psi_N(s_1, t) - \psi_N(s_2, t)\| \leq C|s_1 - s_2| + \frac{C}{N}$ . We now turn to the infinite depth limit  $N \rightarrow \infty$ . Th. 1 shows that there exists a limit function  $\psi$  such that  $\psi_N$  converges uniformly to  $\psi$  in depth  $s$  and optimization time  $t$ . Furthermore, this limit is Lipschitz continuous in  $(s, t)$ . In addition, we show that the ResNet  $\Pi^N$  converges to the limit Neural ODE defined by  $\psi$  that is preserved along the optimization flow, exhibiting an implicit regularization property of deep linear ResNets towards Neural ODEs.

**Theorem 1** (Existence of a limit map). *Suppose assumption 1,  $\|\theta_{n+1}^N(0) - \theta_n^N(0)\| \leq \frac{C_0}{N}$  for some  $C_0 > 0$  and that there exists a function  $\psi_{\text{init}} : [0, 1] \rightarrow \mathbb{R}^{d \times d}$  such that  $\psi_N(s, 0) \rightarrow \psi_{\text{init}}(s)$  in  $\|\cdot\|_\infty$  uniformly in  $s$  as  $N \rightarrow \infty$ , at speed  $\frac{1}{N}$ . Then the sequence  $(\psi_N)_{N \in \mathbb{N}}$  uniformly converges (in  $\|\cdot\|_\infty$  w.r.t  $(s, t)$ ) to a limit  $\psi$  Lipschitz continuous in  $(s, t)$  and  $\|\psi - \psi_N\|_\infty = O(\frac{1}{N})$ . Furthermore,  $\Pi^N$  uniformly converges as  $N \rightarrow \infty$  to the mapping  $x_0 \rightarrow x_1$  where  $x_1$  is the solution at time 1 of the Neural ODE  $\frac{dx}{ds}(s) = \psi(s, t)x(s)$  with initial condition  $x_0$ .*

We illustrate Th. 1 in Figure 2. The assumption on the existence of  $\psi_{\text{init}}$  ensures a convergence at speed  $\frac{1}{N}$  to a Neural ODE at optimization time 0. Note that for instance, the constant initialization  $\theta_n^N(0) = \theta_0 \in \mathbb{R}^{d \times d}$  satisfies this hypothesis. In order to prove Th. 1, for which a full proof is presented in appendix A.5, we first present a useful lemma: the weights of the network have at least one accumulation point.

**Lemma 1** (Existence of limit functions). *For  $s \in [0, 1]$  and  $t \in \mathbb{R}_+$ , let  $\psi_N(s, t) = \theta_{\lfloor Ns \rfloor}^N(t)$ . Under the assumptions of Prop. 2, there exists a subsequence  $\psi_{\sigma(N)}$  and  $\psi_\sigma : [0, 1] \times \mathbb{R}_+ \rightarrow \mathbb{R}^{d \times d}$  Lipschitz continuous with respect to both parameters  $s$  and  $t$  such that  $\psi_{\sigma(N)} \rightarrow \psi_\sigma$  uniformly (in  $\|\cdot\|_\infty$  w.r.t  $(s, t)$ ).*

Lemma 1 is proved in appendix A.3, and gives us the existence of a Lipschitz continuous accumulation point, but not the uniqueness nor the convergence speed. For the uniqueness, we show in appendix A.5 that, under the assumptions of Th. 1, one has that any accumulation point of  $\psi_\sigma$  satisfies the limit Neural ODE

$$\partial_t \psi_\sigma(\cdot, t) = F(\psi_\sigma(\cdot, t)), \quad \psi_\sigma(\cdot, 0) = \psi_{\text{init}}(\cdot, 0),$$

and show that  $F$  satisfies the hypothesis of the Picard–Lindelöf theorem, hence showing the uniqueness of  $\psi$ . We finally show that, as intuitively expected, trajectories of the weights of our linear ResNets of depth  $N$  and  $2N$  remain close one to each other. This gives the convergence speed in Th. 1. See appendix A.4 for a proof.

**Lemma 2** (Closeness of trajectories). *Suppose assumption 1,  $\|\theta_{n+1}^N(0) - \theta_n^N(0)\| \leq \frac{C_0}{N}$  for some  $C_0 > 0$  and that  $\|\theta_n^N(0) - \theta_{2n}^{2N}(0)\| = O(\frac{1}{N})$ . Then  $\forall t \in \mathbb{R}_+$ ,  $\|\theta_n^N(t) - \theta_{2n}^{2N}(t)\| = O(\frac{1}{N})$ .*

## 4 Adjoint Method in Residual Networks

In this section, we focus on a particularly useful feature of Neural ODEs and its applicability to ResNets: their memory free backpropagation thanks to the adjoint method. We consider a ResNet (1) and try to invert it using reverse mode Euler discretization of the Neural ODE (2) when  $\varphi_\Theta$  is any smooth interpolation of the ResNet. This corresponds to defining  $\tilde{x}_N = x_N$  and iterate for  $n \in \{N-1, \dots, 0\}$ :

$$\tilde{x}_n = \tilde{x}_{n+1} - \frac{1}{N} f(\tilde{x}_{n+1}, \theta_n^N). \quad (6)$$

We then use the approximated activations  $(\tilde{x}_n)_{n \in [N]}$  as a proxy for the true activations  $(x_n)_{n \in [N]}$  to compute gradients without storing the activations:

$$\tilde{\nabla}_{\theta_{n-1}^N} L = \frac{1}{N} [\partial_\theta f(\tilde{x}_{n-1}, \theta_{n-1}^N)]^\top \nabla_{\tilde{x}_n} L, \quad \nabla_{\tilde{x}_{n-1}} L = [I + \frac{1}{N} \partial_x f(\tilde{x}_{n-1}, \theta_{n-1}^N)]^\top \nabla_{\tilde{x}_n} L. \quad (7)$$

The approximate recovery of the activations in Eq. (6) is implementable for *any* ResNet: there is no need for particular architecture or forward rule modification. The drawback is that the recovery is

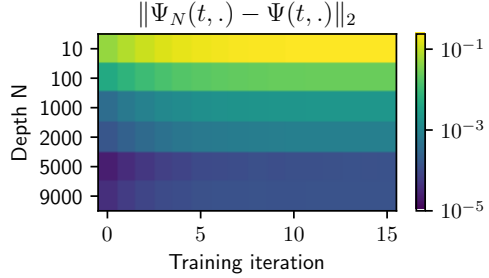

Figure 2:  $L_2$  norm  $\|\Psi_N(t, \cdot) - \Psi(t, \cdot)\|_2$  (w.r.t depth  $s$ ) for different training iterations  $t$  (horizontal axis) and different depth  $N$  (vertical axis). As predicted by Th. 1, this distance goes to 0 as  $N \rightarrow +\infty$ .

only approximate. We devote the remainder of the section to the study of the corresponding errors and to error reduction using second order Heun’s method. We first show that, if  $f(\cdot, \theta_n^N)$  and its derivative are bounded by a constant independent of  $N$ , then the error for reconstructing the activations in the backward scheme (6) is  $O(\frac{1}{N})$ . Proofs of the theoretical results are in appendix A.

**Error for reconstructing activations.** We consider the following assumption:

**Assumption 2.** *There exists constants  $C_f$  and  $L_f$  such that  $\forall N \in \mathbb{N}, \forall n \in [N - 1], \|f(\cdot, \theta_n^N)\|_\infty \leq C_f$  and  $\|\partial_x[f(\cdot, \theta_n^N)]\|_\infty \leq L_f$ .*

Then the error made by reconstructing the activations is in  $O(\frac{1}{N})$ .

**Proposition 3** (Reconstruction error). *With assumption 2, one has  $\|x_n - \tilde{x}_n\| \leq \frac{(e^{L_f} - 1)C_f}{N} + O(\frac{1}{N^2})$ .*

Prop. 3 shows a slow convergence of the error for recovering activations. This bound does not depend on the discrete derivative  $f(\cdot, \theta_{n+1}^N) - f(\cdot, \theta_n^N)$ , contrarily to the errors between the ResNet activations and the trajectory of the interpolating Neural ODE in Prop 1. In summary, even though regularity in depth is necessary to imply closeness to a Neural ODE, it is not necessary to recover activations, and neither gradients, as we now show.

**Error in gradients when using the adjoint method.** We use the result obtained in Prop. 3 to derive a bound in  $O(\frac{1}{N^2})$  on the error made for computing gradients using formulas (7).

**Proposition 4** (Gradient error). *Suppose assumption 2. Suppose in addition that  $\partial_x f(\cdot, \theta)$  admits a Lipschitz constant  $L_{df}$ ,  $\partial_\theta f(\cdot, \theta)$  admits a Lipschitz constant  $\Delta$ , and an upper bound  $\Omega$ , all of which are independent of  $\theta$ . Then one has  $\|\tilde{\nabla}_{\theta_n^N} L - \nabla_{\theta_n^N} L\| = O(\frac{1}{N^2})$ .*

For a proof, see appendix A.7, where we give the dependency of our upper bound as a function of  $\Delta, L_f, C_f, \Omega$  and  $L_{df}$ .

**Smoothness-dependent reconstruction with Heun’s method.** The bounds in Prop. 3 and 4 do not depend on the smoothness with respect to the weights of the  $f(\cdot, \theta_n^N)$ . Only the magnitude of the residuals plays a role in the correct recovery of the activations and estimation of the gradient. Hence, there is no apparent benefit of having such a network behave like a Neural ODE. We now turn to Heun’s method, a second order integration scheme, and show that in this case smoothness in depth of the network improves activation recovery. A HeunNet [30] of depth  $N$  with parameters  $\theta_1^N, \dots, \theta_N^N$  iterates for  $n = 0, \dots, N - 1$ :

$$y_n = x_n + \frac{1}{N}f(x_n, \theta_n^N) \quad \text{and} \quad x_{n+1} = x_n + \frac{1}{2N}(f(x_n, \theta_n^N) + f(y_n, \theta_{n+1}^N)). \quad (8)$$

These forward iterations can once again be approximately reversed by doing for  $n = N - 1, \dots, 0$ :

$$\tilde{y}_n = \tilde{x}_{n+1} - \frac{1}{N}f(\tilde{x}_{n+1}, \theta_{n+1}^N) \quad \text{and} \quad \tilde{x}_n = \tilde{x}_{n+1} - \frac{1}{2N}(f(\tilde{x}_{n+1}, \theta_{n+1}^N) + f(\tilde{y}_n, \theta_n^N)), \quad (9)$$

which also enables approximated backpropagation without storing activations. When discretizing an ODE, Heun’s method has a better  $O(\frac{1}{N^2})$  error, hence we expect a better recovery than in Prop. 3. Indeed, we have:

**Proposition 5** (Reconstruction error - Heun’s method). *Assume assumption 2. Denote by  $L'_f$  the Lipschitz constant of  $x \mapsto \frac{1}{2}(f(x, \theta_{n+1}^N) + f(x - \frac{1}{N}f(x, \theta_{n+1}^N), \theta_n^N))$ , by  $L_\theta$  the Lipschitz constant of  $\theta \mapsto f(\cdot, \theta)$  and by  $L'_\theta$  that of  $\theta \mapsto \partial_x f(\cdot, \theta)$ . Let  $C'_f = \frac{1}{4}L'_f L_\theta$ . Finally, define  $\Delta_\theta^N := \max_n \|\theta_{n+1}^N - \theta_n^N\|^2$ . Using Heun’s method, we have:  $\|x_n - \tilde{x}_n\| \leq \frac{(e^{L'_f} - 1)C'_f}{L'_f N} \times \Delta_\theta^N + O(\frac{1}{N^2})$ .*

This bound is very similar to that in proposition 3, with an additional factor  $\Delta_\theta^N$ . Hence, we see that under the condition that  $\Delta_\theta^N = O(\frac{1}{N})$ , the reconstruction error  $\|x_n - \tilde{x}_n\|$  is in  $O(\frac{1}{N^2})$ . In the linear case, we have proven under some hypothesis in Prop. 2 that such a condition on  $\Delta_\theta^N$  holds during training. Consequently, the smoothness of the weights of a HeunNet in turns helps it recover the activations, while it is not true for a ResNet. This provides better guarantees on the error on gradients:

**Proposition 6** (Gradient error - Heun’s method). *Suppose assumption 2. Suppose in addition that  $\partial_x f(\cdot, \theta)$  admits Lipschitz constant,  $\partial_\theta f(\cdot, \theta)$  admits a Lipschitz constant and an upper bound, all of which are independent of  $\theta$ . Then one has  $\|\tilde{\nabla}_{\theta_N} L - \nabla_{\theta_N} L\| = O(\frac{\Delta_N}{N^2} + \frac{1}{N^3})$ .*

Just like with activation, we see that Heun’s method allows for a better gradient estimation when the weights are smooth with depth. Equivalently, for a fixed depth, this proposition indicates that HeunNets have a better estimation of the gradient with the adjoint method than ResNets which ultimately leads to better training and overall better performances by such memory-free model.

## 5 Experiments

We now present experiments to investigate the applicability of the results presented in this paper. We use Pytorch [33] and Nvidia Tesla V100 GPUs. Our code is available on GitHub. All the experimental details are given in appendix B, and we provide a recap on ResNet architectures in appendix C.

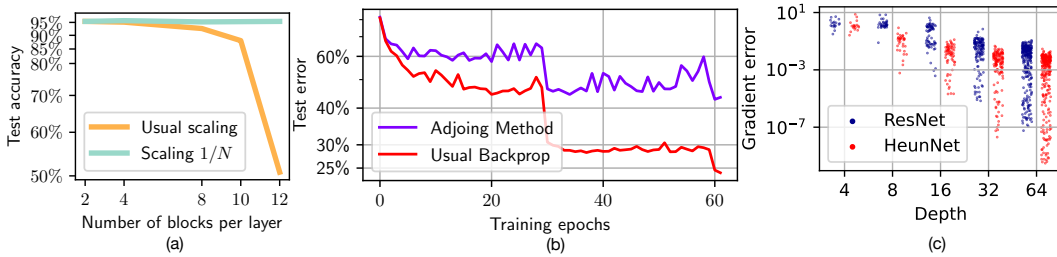

Figure 3: (a) **Test accuracy on CIFAR-10** as a function of the number of blocks in each layer of the ResNet. Within each layer, weights are tied (3 runs). (b) **Failure** of the adjoint method with a ResNet-101 on ImageNet (the approximated gradients are only used in the third layer of the network, that contains 23 blocks). (c) **Relative error** between the approximated gradients using adjoint method and the true gradient, whether using a ResNet or a HeunNet. Each point corresponds to one parameter.

### 5.1 Validation of our model with step size $\frac{1}{N}$

The ResNet model (1) is different from the classical ResNet because of the  $\frac{1}{N}$  term. This makes the model depth aware, and we want to study the impact of this modification on the accuracy on CIFAR and ImageNet. We first train a ResNet-101 [20] on CIFAR-10 and ImageNet using the same hyper-parameters. Experimental details are in appendix B and results are summarized in table 1, showing that the explicit addition of the step size  $\frac{1}{N}$  does not affect accuracy. In strike contrast, the classical ResNet rule without the scaling  $\frac{1}{N}$  makes the network behave badly at large depth, while it still works well with our scaling  $\frac{1}{N}$ , as shown in Figure 3 (a). On ImageNet, the scaling  $\frac{1}{N}$  also leads to similar test accuracy in the weight tied setting: 72.5% with 4 blocks per layer, 73.2% with 8 blocks per layer and 72% with 16 blocks per layer (mean over 2 runs).

Table 1: Test accuracy (ResNet-101)

|          | ResNet-101  | Ours        |
|----------|-------------|-------------|
| CIFAR-10 | 95.5 ± 0.1% | 95.5 ± 0.1% |
| ImageNet | 77.8%       | 77.9%       |

### 5.2 Adjoint method

**New training strategy.** Our results in Prop. 3 and 4 assume uniform bounds in  $N$  on our residual functions and their derivatives. We also formally proved in the linear setting that these assumptions hold during the whole learning process if the initial loss is small. A natural idea to start from a small loss is to consider a pretrained model. In addition, we also want our pretrained model to verify assumption 2 so we consider the following setup. On CIFAR (resp. ImageNet) we train a ResNet with 4 (resp. 8) blocks in each layer, where weights are tied within each layer. A first observation is that one can transfer these weights to deeper ResNets without significantly affecting the test accuracy of

Table 2: Test accuracy (ResNet)

|          | Before F.T.   | After F.T     |
|----------|---------------|---------------|
| CIFAR-10 | 95.25 ± 0.2 % | 95.65 ± 0.1 % |
| ImageNet | 73.1 %        | 75.1 %        |



the model: it remains above 94.5% on CIFAR-10 and 72% on ImageNet. We then *untie the weights* of our models and refine them. More precisely, for CIFAR, we then transfer the weights of our model to a ResNet with 4, 4, 64 and 4 blocks within each layer and fine-tune it only by refining the third layer, using our adjoint method. We display in table 2 the median of the new test accuracy, over 5 runs for the initial pretraining of the model. For ImageNet, we transfer the weights to a ResNet with 100 blocks per layer and fine-tune the whole model with our adjoint method for the residual layers. Results are summarized in table 2. To the best of our knowledge, this is the first time a Neural-ODE like ResNet achieves a test-accuracy of 75.1% on ImageNet.

**Failure in usual settings.** In Prop. 3 we showed under assumption 2, that is if the residuals are bounded and Lipschitz continuous with constant independent of the depth  $N$ , then the error for computing the activations backward would scale in  $\frac{1}{N}$  as well as the error for the gradients (Prop. 4). First, this results shows that the architecture needs to be deep enough, because it scales in  $\frac{1}{N}$ : for instance, we fail to train a ResNet-101 [20] on the ImageNet dataset using the adjoint method on its third layer (depth 23), as shown in Figure 3 (b).

**Success at large depth.** To further investigate the applicability of the adjoint method for training deeper ResNets, we train a simple ResNet model on the CIFAR data set. First, the input is processed by a  $5 \times 5$  convolution with 16 out channels, and the image is down-sampled to a size  $10 \times 10$ . We then apply a batch norm, a ReLU and iterate relation (1) where  $f$  is a pre-activation basic block [21]. We consider the zero residual initialisation: the last batch norm of each basic block is initialized to zero. We consider different values for the depth  $N$  and notice that in this setup, the deeper our model is, the better it performs in term of test accuracy. We then compare the performance of our model using a ResNet (forward rule (1)) or a HeunNet (forward rule (8)). We train our networks using either the classical backpropagation or our corresponding proxys using the adjoint method (formulas (6) and (9)). We display the final test accuracy (median over 5 runs) for different values of the depth  $N$  in Figure 4. The true backpropagation gives the same curves for the ResNet and the HeunNet. Approximated gradients, however, lead to a large test error at small depth, but give the same performance at large depth, hence confirming our results in Prop. 4 and 6. In addition, at fixed depth, the accuracy when training a HeunNet with the adjoint method is better (or similar at depths 2, 32 and 64) than for the ResNet with the adjoint method. This is to be linked with the two different bounds in Prop. 4 and 6: for the HeunNet, smoothness with depth, which is expected at large depth, according to the theoretical results for the linear case (Prop. 2), implies a faster convergence to the true gradients for the HeunNet than for the ResNet. We finally validate this convergence in Figure 3 (c): the deeper the architecture, the better the approximation on the gradients. In addition, the HeunNet approximates the true gradient better than the ResNet.

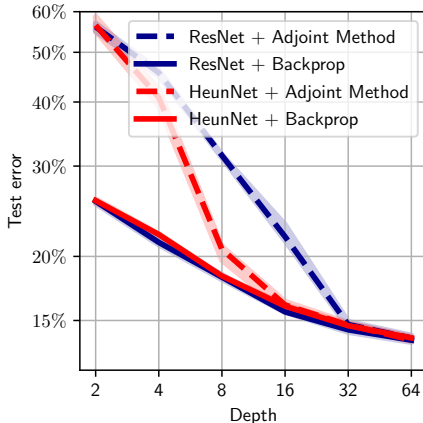

Figure 4: **Comparison** of the best test errors as a function of depth when using Euler or Heun’s discretization method with or without the adjoint method.

## Conclusion, limitations and future works

We propose a methodology to analyze how well a ResNet discretizes a Neural ODE. The positive results predicted by our theory in the linear case are also observed in practice with real architectures: one can successfully use the adjoint method to train ResNets (or even more effectively HeunNets) using very deep architectures on CIFAR, or fine-tune them on ImageNet, without memory cost in the residual layers. However, we also show that for large scale problems such as ImageNet classification from scratch, the adjoint method fails at usual depths.

Our work provides a theoretical guarantee for the convergence to a Neural ODE in the linear setting under a small loss initialization. A natural extension would be to study the non-linear case. In addition, the adjoint method is time consuming, and an improvement would be to propose a cheaper method than a reverse mode traversal of the architecture for approximating the activations.

## Acknowledgments

This work was granted access to the HPC resources of IDRIS under the allocation 2020-[AD011012073] made by GENCI. This work was supported in part by the French government under management of Agence Nationale de la Recherche as part of the “Investissements d’avenir” program, reference ANR19-P3IA-0001 (PRAIRIE 3IA Institute). This work was supported in part by the European Research Council (ERC project NORIA). M. S. thanks Mathieu Blondel and Zaccharie Ramzi for helpful discussions.

## References

- [1] Sanjeev Arora, Nadav Cohen, and Elad Hazan. On the optimization of deep networks: Implicit acceleration by overparameterization. In *International Conference on Machine Learning*, pages 244–253. PMLR, 2018.
- [2] Sanjeev Arora, Nadav Cohen, Wei Hu, and Yuping Luo. Implicit regularization in deep matrix factorization. *Advances in Neural Information Processing Systems*, 32, 2019.
- [3] Raphaël Barboni, Gabriel Peyré, and François-Xavier Vialard. Global convergence of resnets: From finite to infinite width using linear parameterization. *arXiv preprint arXiv:2112.05531*, 2021.
- [4] Peter Bartlett, Dave Helmbold, and Philip Long. Gradient descent with identity initialization efficiently learns positive definite linear transformations by deep residual networks. In *International conference on machine learning*, pages 521–530. PMLR, 2018.
- [5] Atilim Gunes Baydin, Barak A Pearlmutter, Alexey Andreyevich Radul, and Jeffrey Mark Siskind. Automatic differentiation in machine learning: a survey. *Journal of machine learning research*, 18, 2018.
- [6] Irwan Bello, William Fedus, Xianzhi Du, Ekin Dogus Cubuk, Aravind Srinivas, Tsung-Yi Lin, Jonathon Shlens, and Barret Zoph. Revisiting resnets: Improved training and scaling strategies. *Advances in Neural Information Processing Systems*, 34, 2021.
- [7] Haim Brezis and Haim Brézis. *Functional analysis, Sobolev spaces and partial differential equations*, volume 2. Springer, 2011.
- [8] Tian Qi Chen, Yulia Rubanova, Jesse Bettencourt, and David K Duvenaud. Neural ordinary differential equations. In *Advances in neural information processing systems*, pages 6571–6583, 2018.
- [9] Alain-Sam Cohen, Rama Cont, Alain Rossier, and Renyuan Xu. Scaling properties of deep residual networks. In *International Conference on Machine Learning*, pages 2039–2048. PMLR, 2021.
- [10] Rama Cont, Alain Rossier, and Ren Yuan Xu. Convergence and implicit regularization properties of gradient descent for deep residual networks. *arXiv preprint arXiv:2204.07261*, 2022.
- [11] Miles Cranmer, Sam Greydanus, Stephan Hoyer, Peter Battaglia, David Spergel, and Shirley Ho. Lagrangian neural networks. *arXiv preprint arXiv:2003.04630*, 2019.
- [12] Christa Cuchiero, Martin Larsson, and Josef Teichmann. Deep neural networks, generic universal interpolation, and controlled odes. *SIAM Journal on Mathematics of Data Science*, 2(3):901–919, 2020.
- [13] Jean-Pierre Demailly. *Analyse numérique et équations différentielles-4ème Ed.* EDP sciences, 2016.
- [14] Alexey Dosovitskiy, Lucas Beyer, Alexander Kolesnikov, Dirk Weissenborn, Xiaohua Zhai, Thomas Unterthiner, Mostafa Dehghani, Matthias Minderer, Georg Heigold, Sylvain Gelly, et al. An image is worth 16x16 words: Transformers for image recognition at scale. *arXiv preprint arXiv:2010.11929*, 2020.

- [15] Simon Du, Jason Lee, Haochuan Li, Liwei Wang, and Xiyu Zhai. Gradient descent finds global minima of deep neural networks. In *International Conference on Machine Learning*, pages 1675–1685. PMLR, 2019.
- [16] Aidan N Gomez, Mengye Ren, Raquel Urtasun, and Roger B Grosse. The reversible residual network: Backpropagation without storing activations. In I. Guyon, U. V. Luxburg, S. Bengio, H. Wallach, R. Fergus, S. Vishwanathan, and R. Garnett, editors, *Advances in Neural Information Processing Systems*. Curran Associates, Inc., 2017.
- [17] Will Grathwohl, Ricky TQ Chen, Jesse Bettencourt, Ilya Sutskever, and David Duvenaud. Ffjord: Free-form continuous dynamics for scalable reversible generative models. *arXiv preprint arXiv:1810.01367*, 2018.
- [18] Samuel Greydanus, Misko Dzamba, and Jason Yosinski. Hamiltonian neural networks. In *Advances in Neural Information Processing Systems*, pages 15353–15363, 2019.
- [19] Kaiming He, Xiangyu Zhang, Shaoqing Ren, and Jian Sun. Delving deep into rectifiers: Surpassing human-level performance on imagenet classification. In *Proceedings of the IEEE international conference on computer vision*, pages 1026–1034, 2015.
- [20] Kaiming He, Xiangyu Zhang, Shaoqing Ren, and Jian Sun. Deep residual learning for image recognition. In *Proceedings of the IEEE conference on computer vision and pattern recognition*, pages 770–778, 2016.
- [21] Kaiming He, Xiangyu Zhang, Shaoqing Ren, and Jian Sun. Identity mappings in deep residual networks, 2016.
- [22] Sergey Ioffe and Christian Szegedy. Batch normalization: Accelerating deep network training by reducing internal covariate shift. In *International conference on machine learning*, pages 448–456. PMLR, 2015.
- [23] Jörn-Henrik Jacobsen, Arnold W.M. Smeulders, and Edouard Oyallon. i-revnet: Deep invertible networks. In *International Conference on Learning Representations*, 2018.
- [24] Patrick Kidger. On neural differential equations. *arXiv preprint arXiv:2202.02435*, 2022.
- [25] Qianxiao Li, Ting Lin, and Zuowei Shen. Deep learning via dynamical systems: An approximation perspective. *arXiv preprint arXiv:1912.10382*, 2019.
- [26] Chaoyue Liu, Libin Zhu, and Mikhail Belkin. On the linearity of large non-linear models: when and why the tangent kernel is constant. *Advances in Neural Information Processing Systems*, 33, 2020.
- [27] Yiping Lu, Zhuohan Li, Di He, Zhiqing Sun, Bin Dong, Tao Qin, Liwei Wang, and Tie-Yan Liu. Understanding and improving transformer from a multi-particle dynamic system point of view. *arXiv preprint arXiv:1906.02762*, 2019.
- [28] Yiping Lu, Chao Ma, Yulong Lu, Jianfeng Lu, and Lexing Ying. A mean field analysis of deep resnet and beyond: Towards provably optimization via overparameterization from depth. In *International Conference on Machine Learning*, pages 6426–6436. PMLR, 2020.
- [29] Yiping Lu, Aoxiao Zhong, Quanzheng Li, and Bin Dong. Beyond finite layer neural networks: Bridging deep architectures and numerical differential equations. In *International Conference on Machine Learning*, pages 3276–3285. PMLR, 2018.
- [30] Mehrdad Maleki, Mansura Habiba, and Barak A Pearlmutter. Heunnet: Extending resnet using heun’s method. In *2021 32nd Irish Signals and Systems Conference (ISSC)*, pages 1–6. IEEE, 2021.
- [31] Pierre Marion, Adeline Fermanian, Gérard Biau, and Jean-Philippe Vert. Scaling resnets in the large-depth regime. *arXiv preprint arXiv:2206.06929*, 2022.
- [32] Katharina Ott, Prateek Katiyar, Philipp Hennig, and Michael Tiemann. Resnet after all: Neural {ode}s and their numerical solution. In *International Conference on Learning Representations*, 2021.

- [33] Adam Paszke, Sam Gross, Soumith Chintala, Gregory Chanan, Edward Yang, Zachary DeVito, Zeming Lin, Alban Desmaison, Luca Antiga, and Adam Lerer. Automatic differentiation in pytorch. 2017.
- [34] Chao Peng, Xiangyu Zhang, Gang Yu, Guiming Luo, and Jian Sun. Large kernel matters—improve semantic segmentation by global convolutional network. In *Proceedings of the IEEE conference on computer vision and pattern recognition*, pages 4353–4361, 2017.
- [35] Lev Semenovich Pontryagin. *Mathematical theory of optimal processes*. CRC press, 1987.
- [36] Lars Ruthotto and Eldad Haber. Deep neural networks motivated by partial differential equations. *Journal of Mathematical Imaging and Vision*, pages 1–13, 2019.
- [37] Michael E. Sander, Pierre Ablin, Mathieu Blondel, and Gabriel Peyré. Momentum residual neural networks. In *Proceedings of the 38th International Conference on Machine Learning*, volume 139 of *Proceedings of Machine Learning Research*, pages 9276–9287. PMLR, 18–24 Jul 2021.
- [38] Michael E Sander, Pierre Ablin, Mathieu Blondel, and Gabriel Peyré. Sinkformers: Transformers with doubly stochastic attention. In *Proceedings of The 25th International Conference on Artificial Intelligence and Statistics*, volume 151 of *Proceedings of Machine Learning Research*, pages 3515–3530. PMLR, 18–24 Jul 2022.
- [39] Qi Sun, Yunzhe Tao, and Qiang Du. Stochastic training of residual networks: a differential equation viewpoint. *arXiv preprint arXiv:1812.00174*, 2018.
- [40] Y Teh, Arnaud Doucet, and E Dupont. Augmented neural odes. *Advances in Neural Information Processing Systems 32 (NIPS 2019)*, 32(2019), 2019.
- [41] Takeshi Teshima, Koichi Tojo, Masahiro Ikeda, Isao Ishikawa, and Kenta Oono. Universal approximation property of neural ordinary differential equations. *arXiv preprint arXiv:2012.02414*, 2020.
- [42] Ashish Vaswani, Noam Shazeer, Niki Parmar, Jakob Uszkoreit, Llion Jones, Aidan N Gomez, Łukasz Kaiser, and Illia Polosukhin. Attention is all you need. In *Advances in neural information processing systems*, pages 5998–6008, 2017.
- [43] Linnan Wang, Jinmian Ye, Yiyang Zhao, Wei Wu, Ang Li, Shuaiwen Leon Song, Zenglin Xu, and Tim Kraska. Superneurons: Dynamic gpu memory management for training deep neural networks. In *Proceedings of the 23rd ACM SIGPLAN Symposium on Principles and Practice of Parallel Programming*, pages 41–53, 2018.
- [44] E Weinan. A proposal on machine learning via dynamical systems. *Communications in Mathematics and Statistics*, 5(1):1–11, 2017.
- [45] E Weinan, Jiequn Han, and Qianxiao Li. A mean-field optimal control formulation of deep learning. *Research in the Mathematical Sciences*, 6(1):10, 2019.
- [46] Ross Wightman, Hugo Touvron, and Hervé Jégou. Resnet strikes back: An improved training procedure in timm. *arXiv preprint arXiv:2110.00476*, 2021.
- [47] Ge Yang and Samuel Schoenholz. Mean field residual networks: On the edge of chaos. *Advances in neural information processing systems*, 30, 2017.
- [48] Jun-Yan Zhu, Taesung Park, Phillip Isola, and Alexei A Efros. Unpaired image-to-image translation using cycle-consistent adversarial networks. In *Proceedings of the IEEE international conference on computer vision*, pages 2223–2232, 2017.
- [49] Juntang Zhuang, Nicha Dvornek, Xiaoxiao Li, Sekhar Tatikonda, Xenophon Papademetris, and James Duncan. Adaptive checkpoint adjoint method for gradient estimation in neural ode. In *International Conference on Machine Learning*, pages 11639–11649. PMLR, 2020.
- [50] Juntang Zhuang, Nicha C Dvornek, Sekhar Tatikonda, and James S Duncan. Mali: A memory efficient and reverse accurate integrator for neural odes. *arXiv preprint arXiv:2102.04668*, 2021.
- [51] Difan Zou, Philip M Long, and Quanquan Gu. On the global convergence of training deep linear resnets. *arXiv preprint arXiv:2003.01094*, 2020.

## Checklist

1. For all authors...
  - (a) Do the main claims made in the abstract and introduction accurately reflect the paper's contributions and scope? [Yes]
  - (b) Did you describe the limitations of your work? [Yes]
  - (c) Did you discuss any potential negative societal impacts of your work? [No]
  - (d) Have you read the ethics review guidelines and ensured that your paper conforms to them? [Yes]
2. If you are including theoretical results...
  - (a) Did you state the full set of assumptions of all theoretical results? [Yes] , all the assumptions are stated.
  - (b) Did you include complete proofs of all theoretical results? [Yes] , the proofs are in the supplementary material.
3. If you ran experiments...
  - (a) Did you include the code, data, and instructions needed to reproduce the main experimental results (either in the supplemental material or as a URL)? [Yes] , in appendix B
  - (b) Did you specify all the training details (e.g., data splits, hyperparameters, how they were chosen)? [Yes] , in appendix B
  - (c) Did you report error bars (e.g., with respect to the random seed after running experiments multiple times)? [Yes] , see Figure 4 and table 2
  - (d) Did you include the total amount of compute and the type of resources used (e.g., type of GPUs, internal cluster, or cloud provider)? [Yes]
4. If you are using existing assets (e.g., code, data, models) or curating/releasing new assets...
  - (a) If your work uses existing assets, did you cite the creators? [Yes] for Pytorch, CIFAR, ImageNet
  - (b) Did you mention the license of the assets? [Yes]
  - (c) Did you include any new assets either in the supplemental material or as a URL? [N/A]
  - (d) Did you discuss whether and how consent was obtained from people whose data you're using/curating? [N/A]
  - (e) Did you discuss whether the data you are using/curating contains personally identifiable information or offensive content? [N/A]
5. If you used crowdsourcing or conducted research with human subjects...
  - (a) Did you include the full text of instructions given to participants and screenshots, if applicable? [N/A]
  - (b) Did you describe any potential participant risks, with links to Institutional Review Board (IRB) approvals, if applicable? [N/A]
  - (c) Did you include the estimated hourly wage paid to participants and the total amount spent on participant compensation? [N/A]

## APPENDIX

In Section A we give the proofs of all the propositions, lemmas and the theorem presented in this work.

Section B gives details for the experiments in the paper.

We also give a recap on ResNet architectures in Section C.

### A Proofs

#### A.1 Proof of Prop. 1

Our proof is inspired by [13].

*Proof.* We denote  $h = \frac{1}{N}$  and  $s_n = nh$ . We define

$$\varepsilon_n = x(s_{n+1}) - x(s_n) - h\varphi_{\Theta}(x(s_n), s_n).$$

We have that  $\varphi_{\Theta}(x(s_n), s_n) = \dot{x}(s_n)$ .

Taylor's formula gives

$$x(s_n + h) = x(s_n) + h\dot{x}(s_n) + R_1(h)$$

with  $\|R_1(h)\| \leq \frac{1}{2}h^2\|\ddot{x}\|_{\infty}$ . This implies that

$$\|\varepsilon_n\| \leq \frac{1}{2}h^2\|\ddot{x}\|_{\infty}.$$

The true error we are interested in is the global error  $e_n = x(s_n) - x_n$ . One has

$$e_{n+1} - e_n = x(s_{n+1}) - x(s_n) + x_n - x_{n+1} = \varepsilon_n + h(\varphi_{\Theta}(x(s_n), s_n) - \varphi_{\Theta}(x_n, s_n)).$$

Because  $\varphi_{\Theta}$  is  $L$ -Lipschitz, this gives  $\|e_{n+1} - e_n\| \leq \|\varepsilon_n\| + hL\|e_n\|$  and hence

$$\|e_{n+1}\| \leq (1 + hL)\|e_n\| + \|\varepsilon_n\|.$$

Because  $h = \frac{1}{N}$ , we have

$$\|e_{n+1}\| \leq (1 + \frac{L}{N})\|e_n\| + \frac{1}{2N^2}\|\ddot{x}\|_{\infty}.$$

this implies from the discrete Gronwall lemma, since  $e_0 = 0$  that

$$\|e_n\| \leq \frac{e^L - 1}{2NL}\|\ddot{x}\|_{\infty}.$$

Note that we have  $\ddot{x} = \partial_s \varphi_{\Theta} + \partial_x \varphi_{\Theta}[\varphi_{\Theta}]$ . This gives the desired result. □

#### A.2 Proof of Prop. 2

*Proof.* Recall that we denote  $\Pi^N = \prod_{n=1}^N (I_d + \frac{\theta_n^N}{N})$ ,  $\Pi_{:n}^N = (I_d + \frac{\theta_n^N}{N}) \dots (I_d + \frac{\theta_{n+1}^N}{N})$  and  $\Pi_{:n}^N = (I_d + \frac{\theta_{n-1}^N}{N}) \dots (I_d + \frac{\theta_n^N}{N})$ . We denote  $\nabla_n^N = \nabla_{\theta_n^N} L$ . One has

$$N\nabla_n^N = \Pi_{:n}^{N\top} (\Pi^N - B) \Sigma \Pi_{:n}^{N\top}.$$

One has as in [51] that

$$\sigma_{max}^2(\Pi_{:n}^N) \sigma_{max}^2(\Pi_{:n}^N) \|\Pi - B\|_{\Sigma}^2 M \geq N^2 \|\nabla_n^N\|^2 \geq \sigma_{min}^2(\Pi_{:n}^N) \sigma_{min}^2(\Pi_{:n}^N) \|\Pi - B\|_{\Sigma}^2 m.$$

where  $\sigma_{max}(A)$  (resp.  $\sigma_{min}(A)$ ) denotes the largest (resp. smallest) singular value of  $A$ . We first show that  $\forall t \in \mathbb{R}_+$ ,  $\|\theta_n^N(t)\| < \frac{1}{2}$ . Denote

$$t^* = \inf\{t \in \mathbb{R}_+, \exists n \in [N-1], \|\theta_n^N(t)\| \geq 1/2\}.$$

One has that  $\forall t \in [0, t^*]$ ,  $\sigma_{min}^2(\Pi_{:n}^N) \geq (1 - \frac{1}{2N})^{2(N-n)}$  and  $\sigma_{min}^2(\Pi_n^N) \geq (1 - \frac{1}{2N})^{2(n-1)}$  which implies that

$$N^2 \|\nabla_n^N(t)\|^2 \geq 2(1 - \frac{1}{2N})^{2N-2} \ell^N(t) m \geq \frac{2}{e} \ell^N(t) m.$$

Similarly one has  $N^2 \|\nabla_n^N(t)\|^2 \leq 2e \ell^N(t) M$ . To summarize, we have the PL conditions for  $t \in [0, t^*]$ :

$$\frac{2}{e} m \ell^N(t) \leq N^2 \|\nabla_n^N(t)\|^2 \leq 2e M \ell^N(t).$$

As a consequence, one has

$$\frac{d\ell^N}{dt}(t) = -N \sum_{n=1}^N \|\nabla_n^N(t)\|^2 \leq -\frac{2}{e} m \ell^N(t)$$

and thus  $\ell^N(t) \leq e^{-\frac{2}{e} m t} \ell^N(0)$ .

We have  $\theta_n^N(t^*) = \theta_n^N(0) + N \int_0^{t^*} \nabla_n^N$  and  $\|\nabla_n^N\| \leq \frac{\sqrt{2eM}}{N} \sqrt{\ell^N}$  so that

$$\|\theta_n^N(t^*)\| \leq \|\theta_n^N(0)\| + \sqrt{2eM} \int_0^{t^*} e^{-\frac{1}{e} m t} \sqrt{\ell^N(0)} dt < \frac{1}{4} + \frac{1}{4} < 1/2.$$

This is absurd by definition of  $t^*$  and thus shows that  $\forall t \in \mathbb{R}_+$ ,  $\|\theta_n^N(t)\| < \frac{1}{2}$ . We also see that  $\nabla_n^N$  is integrable so that  $\theta_n^N(t)$  admits a limit as  $t \rightarrow \infty$ .

We now show our main result. Note that we have the relationship  $(I + \frac{\theta_{n+1}^N}{N})^\top \nabla_{n+1} = \nabla_n (I + \frac{\theta_n^N}{N})^\top$  so that

$$\nabla_{n+1}^N - \nabla_n^N = (I + \frac{\theta_{n+1}^N}{N})^{-1} (\frac{\nabla_n^N \theta_n^{N\top} - \theta_{n+1}^{N\top} \nabla_n^N}{N}).$$

Because  $\|(I + A)^{-1}\| \leq 2$  if  $\|A\| \leq \frac{1}{2}$  this gives  $\|\nabla_{n+1}^N - \nabla_n^N\| \leq \frac{2}{N} \|\nabla_n^N\|$ . Integrating we get

$$\|\theta_{n+1}^N(t) - \theta_n^N(t)\| \leq \|\theta_{n+1}^N(0) - \theta_n^N(0)\| + 2 \int_0^t \|\nabla_n^N\|.$$

This gives

$$\|\theta_{n+1}^N(t) - \theta_n^N(t)\| \leq O(\frac{1}{N}) + \frac{1}{N} 2 \int_0^t \sqrt{2eM \ell^N(0)} e^{-\frac{1}{e} m t} dt = O(\frac{1}{N}),$$

which is the desired result. □

### A.3 Proof of lemma 1

*Proof.* We adapt a variant of the Ascoli–Arzelà theorem [7]. We showed in Prop. 2 that there exists  $C > 0$  that only depends on the initialization such that,  $\forall t \geq 0, \forall i \in [N-1]$ ,

$$\|\theta_{n+1}^N(t) - \theta_n^N(t)\| \leq \frac{C}{N}.$$

This implies that

$$\|\theta_j^N(t) - \theta_i^N(t)\| \leq C \frac{|j-i|}{N}.$$

We also have that

$$\|\theta_n^N(t_1) - \theta_n^N(t_2)\| = \|N \int_{t_1}^{t_2} \nabla_n^N\| \leq C' |t_1 - t_2|$$

with  $C' \geq 0$ .

Its follows that  $\|\psi_N(s_1, t_1) - \psi_N(s_2, t_2)\| \leq \|\psi_N(s_1, t_1) - \psi_N(s_1, t_2)\| + \|\psi_N(s_1, t_2) - \psi_N(s_2, t_2)\|$  and thus

$$(i) \quad \|\psi_N(s_1, t_1) - \psi_N(s_2, t_2)\| \leq C' |t_1 - t_2| + C |s_1 - s_2| + \frac{C}{N}.$$

We also have

$$(ii) \quad \forall N \in \mathbb{N}, \quad \|\psi_N\|_\infty \leq \frac{1}{2}.$$

These two properties are essential to prove our lemma. We proceed as follows.

1) First, we denote  $((s_j, t_j))_{j \in \mathbb{N}} = (\mathbb{Q} \cap [0, 1]) \times \mathbb{Q}_+$ . Since we have the uniform bound (ii), we extract using a diagonal extraction procedure a subsequence  $\psi_{\sigma(N)}$  such that  $\forall j \in \mathbb{N}$ ,

$$\psi_{\sigma(N)}(s_j, t_j) \rightarrow \psi(s_j, t_j)$$

(we denote the limit  $\psi(s_j, t_j)$ ).

2) We show the convergence  $\forall s \in [0, 1]$  and  $t \in \mathbb{R}_+$ .

Let  $\varepsilon > 0$ ,  $s \in [0, 1]$  and  $t \in \mathbb{R}_+$ . Since  $((s_j, t_j))_{j \in \mathbb{N}}$  is dense in  $[0, 1] \times \mathbb{R}_+$ , there exists  $k \in \mathbb{N}$  such that  $|s_k - s| < \varepsilon$  and  $|t_k - t| < \varepsilon$ . Let  $N, M \in \mathbb{N}$ .

We have

$$\|\psi_{\sigma(N)}(s, t) - \psi_{\sigma(M)}(s, t)\| \leq \|\psi_{\sigma(N)}(s, t) - \psi_{\sigma(N)}(s_k, t_k)\| + \|\psi_{\sigma(N)}(s_k, t_k) - \psi_{\sigma(M)}(s_k, t_k)\| + \|\psi_{\sigma(M)}(s_k, t_k) - \psi_{\sigma(M)}(s, t)\|$$

so that

$$\|\psi_{\sigma(N)}(s, t) - \psi_{\sigma(M)}(s, t)\| \leq 2C\varepsilon + 2C'\varepsilon + \frac{C}{\sigma(N)} + \frac{C}{\sigma(M)} + \|\psi_{\sigma(N)}(s_k, t_k) - \psi_{\sigma(M)}(s_k, t_k)\|.$$

Since  $(\psi_{\sigma(N)}(s_k, t_k))_{N \in \mathbb{N}}$  is a Cauchy sequence, this gives for  $N, M$  big enough that

$$\|\psi_{\sigma(N)}(s) - \psi_{\sigma(M)}(s, t)\| \leq (2(C + C') + 1)\varepsilon$$

and thus  $(\psi_{\sigma(N)}(s, t))$  is a Cauchy sequence in  $\mathbb{R}^{d \times d}$ . As such, it converges and one has

$$\psi_{\sigma(N)}(s, t) \rightarrow \psi(s, t).$$

3) Recall that one has

$$\|\psi_{\sigma(N)}(s_1, t_1) - \psi_{\sigma(N)}(s_2, t_2)\| \leq C|s_1 - s_2| + \frac{C}{\sigma(N)} + C'|t_1 - t_2|$$

so that letting  $N \rightarrow \infty$  gives

$$\|\psi(s_1, t_1) - \psi(s_2, t_2)\| \leq C|s_1 - s_2| + C'|t_1 - t_2|$$

and  $\psi$  is Lipschitz continuous.

4) Let us finally show that the convergence is uniform in  $(s, t)$ . Let  $s \in [0, 1]$ ,  $\varepsilon > 0$  and  $\delta > 0$  such that if  $|s - u| < \delta$ ,  $\forall t \in \mathbb{R}_+$ ,

$$\|\psi_N(s, t) - \psi_N(u, t)\| \leq \varepsilon + \frac{C}{N}$$

and  $\|\psi(s, t) - \psi(u, t)\| \leq \varepsilon$ . There exists a finite set of  $\{s_j\}_{j=1}^k$  such that

$$[0, 1] \subset \cup_{j=1}^k ]s_j - \frac{\delta}{2}, s_j + \frac{\delta}{2}[.$$

For our  $s$ , there exists  $j \in \{1, \dots, k\}$  such that  $\|s - s_j\| \leq \delta$ .

There also exists  $t_0 \geq 0$  such that if  $t \geq t_0$ ,

$$\|\psi_{\sigma(N)}(s, t) - \psi_{\sigma(N)}(s, t_0)\| \leq \sqrt{2eM} \int_{t_0}^t e^{-\frac{1}{e}mz} \sqrt{\ell^N(0)} dz \leq \varepsilon.$$

We have:

$$\|\psi_{\sigma(N)}(s, t_0) - \psi(s, t_0)\| \leq \|\psi_{\sigma(N)}(s, t_0) - \psi_{\sigma(N)}(s_j, t_0)\| + \|\psi_{\sigma(N)}(s_j, t_0) - \psi(s_j, t_0)\| + \|\psi(s_j, t_0) - \psi(s, t_0)\|$$

and thus:

$$\|\psi_{\sigma(N)}(s, t_0) - \psi(s, t_0)\| \leq 2\varepsilon + \frac{C}{\sigma(N)} + \max_{j \in \{1, \dots, k\}} \|\psi_{\sigma(N)}(s_j, t_0) - \psi(s_j, t_0)\| \leq 4\varepsilon \text{ for } N \text{ big enough.}$$

$$\text{Finally, } \|\psi_{\sigma(N)}(s, t) - \psi(s, t)\| \leq \|\psi_{\sigma(N)}(s, t) - \psi_{\sigma(N)}(s, t_0)\| + \|\psi_{\sigma(N)}(s, t_0) - \psi(s, t_0)\| + \|\psi(s, t_0) - \psi(s, t)\| \leq 6\varepsilon$$

for  $N$  big enough, independently of  $t$  and  $s$ . This concludes the proof.  $\square$



#### A.4 Proof of lemma 2

*Proof.* We group terms 2 by 2 in the product  $\Pi^{2N}$ . One has  $(I + \frac{\theta_{2n}^{2N}}{2N})(I + \frac{\theta_{2n-1}^{2N}}{2N}) = (I + \frac{\tilde{\theta}_n^N}{N})$  with

$$\tilde{\theta}_n^N = (\frac{\theta_{2n}^{2N} + \theta_{2n-1}^{2N}}{2} + \frac{\theta_{2n}^{2N} \theta_{2n-1}^{2N}}{4N}),$$

So that  $\Pi^{2N} = \tilde{\Pi}^N$  where  $\tilde{\Pi}^N$  is defined as  $\Pi^N$  with  $\tilde{\theta}_n^N$ . One has by Prop. 2 that

$$\tilde{\theta}_n^N = \theta_{2n}^{2N} + O(\frac{1}{N}).$$

We will show that  $\tilde{\theta}_n^N = \theta_n^N + O(\frac{1}{N})$ .

Let  $D_n^N = \|\theta_n^N - \tilde{\theta}_n^N\|$  and  $D^N = \frac{1}{N} \sum_{n=1}^N D_n$ . We have

$$2D_n^N \dot{D}_n^N = -N \langle \nabla_n^N - \tilde{\nabla}_n^N, \theta_n^N - \tilde{\theta}_n^N \rangle.$$

In addition, we have

$$N(\nabla_n^N - \tilde{\nabla}_n^N) = \Pi_{:n}^{N\top} (\Pi^N - B) \Sigma \Pi_{:n}^{N\top} - \tilde{\Pi}_{:n}^{N\top} (\tilde{\Pi}^N - B) \Sigma \tilde{\Pi}_{:n}^{N\top}$$

so that

$$N(\nabla_n^N - \tilde{\nabla}_n^N) = (\Pi_{:n}^N - \tilde{\Pi}_{:n}^N)^\top (\Pi^N - B) \Sigma \Pi_{:n}^{N\top} + \tilde{\Pi}_{:n}^{N\top} (\Pi^N - B) \Sigma (\Pi_{:n}^N - \tilde{\Pi}_{:n}^N)^\top + \tilde{\Pi}_{:n}^{N\top} (\Pi^N - \tilde{\Pi}^N) \Sigma \tilde{\Pi}_{:n}^{N\top}.$$

Note also that since the Jacobian of  $(\theta_1, \dots, \theta_N) \rightarrow \Pi^N$  is

$$J_{(\theta_1, \dots, \theta_N)}(H_1, \dots, H_N) = \frac{1}{N} \sum_{n=1}^N \Pi_{:n}^N H_n \Pi_{:n}^N$$

and the  $\theta_n^N$ 's are such that  $\|\theta_n^N\| \leq \frac{1}{2}$ , there exists a constant  $K > 0$  such that  $\|\Pi_{:n}^N - \tilde{\Pi}_{:n}^N\| \leq K D^N$ . Again because  $\|\theta_n^N\| \leq \frac{1}{2}$  and  $\|\tilde{\theta}_n^N\| \leq \frac{1}{2}$ , this gives

$$N \|\nabla_n - \tilde{\nabla}_n\| \leq \alpha K D^N \sqrt{\ell^N} + \beta \|\Pi^N - \tilde{\Pi}^N\|$$

for some constants  $\alpha, \beta$ . Finally, we have

$$\dot{D}_n^N \leq \frac{1}{2} (\alpha K D^N \sqrt{\ell^N} + \beta \|\Pi^N - \tilde{\Pi}^N\|)$$

which gives  $\forall t$

$$2D_n^N(t) \leq \alpha K \int_0^t D^N \sqrt{\ell^N} + \beta \int_0^t \|\Pi^N - \tilde{\Pi}^N\| + O(\frac{1}{N}). \quad (10)$$

We now focus on the  $\beta$  term involving  $\|\Pi^N - \tilde{\Pi}^N\|$ . Denote  $\Delta^N = \Pi^N - \tilde{\Pi}^N$ . One has

$$\dot{\Delta}^N = -\frac{1}{N} \left( \sum_{n=1}^N \Pi_{:n}^N \Pi_{:n}^{N\top} (\Pi^N - B) \Sigma \Pi_{:n}^{N\top} \Pi_{:n}^N + \tilde{\Pi}_{:n}^N \tilde{\Pi}_{:n}^{N\top} (\tilde{\Pi}^N - B) \Sigma \tilde{\Pi}_{:n}^{N\top} \tilde{\Pi}_{:n}^N \right),$$

and equivalently:

$$\dot{\Delta}^N = -\frac{1}{N} \left( \sum_{n=1}^N [\Pi_{:n}^N \Pi_{:n}^{N\top} - \tilde{\Pi}_{:n}^N \tilde{\Pi}_{:n}^{N\top}] (\Pi^N - B) \Sigma \Pi_{:n}^{N\top} \Pi_{:n}^N + \tilde{\Pi}_{:n}^N \tilde{\Pi}_{:n}^{N\top} (\Pi^N - B) \Sigma [\Pi_{:n}^{N\top} \Pi_{:n}^N - \tilde{\Pi}_{:n}^{N\top} \tilde{\Pi}_{:n}^N] + \tilde{\Pi}_{:n}^N \tilde{\Pi}_{:n}^{N\top} (\Pi^N - \tilde{\Pi}^N) \Sigma \tilde{\Pi}_{:n}^{N\top} \tilde{\Pi}_{:n}^N \right).$$

Note that similarly to  $\|\Pi^N - \tilde{\Pi}^N\|$  there exist  $K'$  such that  $\|\Pi_{:n}^N \Pi_{:n}^{N\top} - \tilde{\Pi}_{:n}^N \tilde{\Pi}_{:n}^{N\top}\| \leq K' D$  so that

$$\|\dot{\Delta}^N + \frac{1}{N} \sum_{n=1}^N \tilde{\Pi}_{:n}^N \tilde{\Pi}_{:n}^{N\top} \Delta^N \tilde{\Pi}_{:n}^{N\top} \tilde{\Pi}_{:n}^N\| \leq \alpha K' D \sqrt{\ell^N}.$$

Let us denote by  $H$  the operator:

$$H(\Delta) = \frac{1}{N} \sum_{n=1}^N \tilde{\Pi}_{:n}^N \tilde{\Pi}_{:n}^{N\top} \Delta \Sigma \tilde{\Pi}_{:n}^{N\top} \tilde{\Pi}_{:n}^N.$$

Our (PL) conditions precisely write  $-\Delta^\top H(\Delta) \leq -\lambda \|\Delta\|^2$  for some  $\lambda > 0$ . Let  $\varphi^N = \frac{1}{2} \|\Delta^N\|^2$ . One has

$$\frac{d\varphi^N}{dt} = \langle \Delta^N, \dot{\Delta}^N + H(\Delta^N) \rangle - \langle \Delta^N, H(\Delta^N) \rangle$$

so that

$$\frac{d\varphi^N}{dt} \leq (aK'D\sqrt{\ell^N})\sqrt{2\varphi^N} - 2\lambda\varphi^N.$$

Since  $\|\Delta^N\| = \sqrt{2\varphi^N}$  we get

$$\frac{d\|\Delta^N\|}{dt} = \frac{\frac{d\varphi^N}{dt}}{\sqrt{2\varphi^N}}.$$

We finally have

$$\frac{d\|\Delta^N\|}{dt} \leq aK'D^N\sqrt{\ell^N} - \lambda\|\Delta^N\|.$$

Integrating, we get

$$\|\Delta^N(t)\| \leq -\lambda \int_0^t \|\Delta^N\| + \int_0^t aK'D^N\sqrt{\ell^N} + O\left(\frac{1}{N}\right)$$

and then

$$\int_0^t \|\Delta^N\| \leq \frac{1}{\lambda} \int_0^t aK'D^N\sqrt{\ell^N} + O\left(\frac{1}{N}\right).$$

Plugging this into (10) leads to

$$0 \leq 2D_n^N(t) \leq \alpha K \int_0^t D^N\sqrt{\ell^N} + \frac{\beta}{\lambda} \int_0^t aK'D^N\sqrt{\ell^N} + O\left(\frac{1}{N}\right).$$

Let  $n(t)$  be such that  $D_{n(t)}^N(t) = \max_{i \in [1, N]} D_i^N(t)$ . We have

$$0 \leq 2D_{n(t)}^N(t) \leq \mu \int_0^t D_{n(\tau)}^N(\tau) \sqrt{\ell^N(\tau)} d\tau + O\left(\frac{1}{N}\right)$$

for some constant  $\mu > 0$ . And since  $\sqrt{\ell^N}$  is integrable, we get by Gronwall's inequality that  $D_n^N = O\left(\frac{1}{N}\right) \forall n \in [1, N]$ . We showed:

$$\theta_{2n}^{2N} = \theta_n^N + O\left(\frac{1}{N}\right).$$

□

## A.5 Proof of Th. 1

We first prove the following lemma 3 before proving Th. 1.

**Lemma 3.** *Under the assumptions of Th. 1, let  $\sigma$  be such that  $\psi_{\sigma(N)} \rightarrow \psi_\sigma$  uniformly (in  $\|\cdot\|_\infty$  w.r.t  $(s, t)$ ). Then one has  $\Pi^{\sigma(N)}(t) \rightarrow \Pi(t)$  uniformly (in  $t$ ) where  $\Pi(t)$  maps  $x_0$  to the solution at time 1 of the Neural ODE  $\frac{dx}{ds} = \psi_\sigma(s, t)x(s)$  with initial condition  $x_0$ .*

*Proof.* Consider for  $x_0 \in \mathbb{R}^d$  with  $\|x_0\| = 1$  the discrete scheme

$$x_{n+1} = x_n + \frac{1}{\sigma(N)} \theta_n^{\sigma(N)}(t) x_n,$$

the ODE

$$\frac{dx}{ds} = \psi_\sigma(s, t)x(s),$$

and the Euler scheme with time step  $\frac{1}{\sigma(N)}$  for its discretization

$$y_{n+1} = y_n + \frac{1}{\sigma(N)} \psi_\sigma\left(\frac{n}{\sigma(N)}, t\right) y_n.$$

We know by Prop. 1, since  $x_0$  has unit norm that

$$\|x(\frac{n}{\sigma(N)}) - y_n\| \leq \frac{e^{\frac{1}{2}} - 1}{\sigma(N)} \|\partial_s \psi_\sigma(\cdot, t) + \psi_\sigma^2(\cdot, t)\|_\infty^{K \times [0,1]}$$

where  $K$  is a compact that contains all the trajectory starting from any unit norm initial condition. Since  $\forall t \in \mathbb{R}_+$ ,  $\|\partial_s \psi_\sigma(s, t)\| \leq C$  and  $\|\psi_\sigma(s, t)^2\| \leq \frac{1}{2}$ , there exists  $\tilde{C} > 0$  and independent of  $t$  such that

$$\|x(\frac{n}{\sigma(N)}) - y_n\| \leq \frac{\tilde{C}}{\sigma(N)}$$

Now, let  $e_n = y_n - x_n$ . We have

$$e_{n+1} = e_n(1 + \frac{1}{\sigma(N)} \psi_\sigma(\frac{n}{\sigma(N)}, t)) + \frac{1}{\sigma(N)} (\psi_\sigma(\frac{n}{\sigma(N)}, t) - \psi_{\sigma(N)}(\frac{n}{\sigma(N)}, t)) x_n.$$

Since  $\|\theta_n^N\| \leq \frac{1}{2}$  and  $x_0$  has unit norm, there exists  $M > 0$  independent of  $x_0$  such that,  $\forall n$  and  $N$ ,  $\|x_n\| \leq M$ . Thus

$$\|e_{n+1}\| \leq \|e_n\| (1 + \frac{1}{2\sigma(N)}) + \frac{1}{\sigma(N)} \sup_{(s,t) \in [0,1] \times \mathbb{R}_+} \|\psi_\sigma(s, t) - \psi_{\sigma(N)}(s, t)\| M.$$

The fact that  $\sup_{(s,t) \in [0,1] \times \mathbb{R}_+} \|\psi_\sigma(s, t) - \psi_{\sigma(N)}(s, t)\| \rightarrow 0$  (uniform convergence of  $\psi_{\sigma(N)}$  to  $\psi_\sigma$ ) along with the discrete Gronwall's lemma leads to  $\|e_n\| = o(1)$  independent of  $t$  and  $x_0$ . More precisely,

$$\sup_{t \in \mathbb{R}_+, x_0 \in \mathbb{R}^d, \|x_0\|=1} \|\Pi^{\sigma(N)}(t)x_0 - \Pi(t)x_0\| \rightarrow 0$$

as  $N \rightarrow \infty$ . We obtain the uniform convergence with  $t$ . □

We can now prove our Th. 1.

*Proof.* Consider  $(\psi_{\sigma(N)})_N$  a sub-sequence of  $(\psi_N)_N$  as in lemma 1 that converges to some  $\psi_\sigma$ .

1) We first prove the uniqueness of the limit.

We want to show that  $\psi_\sigma$  does not depend on  $\sigma$ . This will imply the uniqueness of any accumulation point of the relatively compact sequence  $(\psi_N)_N$  and thus its convergence.

We have  $\forall s \in [0, 1]$ ,

$$\partial_t \psi_{\sigma(N)}(s, t) = -\Pi_{[\sigma(N)s]}^{\sigma(N)\top}(t) (\Pi^{\sigma(N)}(t) - B) \Pi_{[\sigma(N)s]}^{\sigma(N)\top}(t).$$

As  $N \rightarrow \infty$ , we have thanks to lemma 3 that the right hand term converges uniformly to

$$-\Pi_{:s}^\top(t) (\Pi(t) - B) \Pi_{:s}^\top(t)$$

where  $\Pi$  maps  $x_0$  to the solution at time 1 of the Neural ODE  $\frac{dx}{ds} = \psi_\sigma(s, t)x(s)$  with initial condition  $x_0$ ,  $\Pi_{:s}(t)$  maps  $x_0$  to the solution at time  $s$  of the Neural ODE  $\frac{dx}{ds} = \psi_\sigma(s, t)x(s)$  with initial condition  $x_0$  and  $\Pi_{s:}(t)$  maps  $x_0$  to the solution at time  $1 - s$  of the Neural ODE  $\frac{dx}{ds} = \psi_\sigma(s, t)x(s)$  with initial condition  $x_0$ .

This uniform convergence makes it possible to consider the limit ODE as  $N \rightarrow \infty$ :

$$\partial_t \psi_\sigma(\cdot, t) = F(\psi_\sigma(\cdot, t)), \quad \psi_\sigma(\cdot, 0) = 0_{d \times d} \tag{11}$$

where  $\forall s \in [0, 1]$ ,

$$F(\psi_\sigma(s, t)) = -\Pi_{:s}^\top(t) (\Pi(t) - B) \Pi_{s:}^\top(t).$$

We now show that  $F$  is Lipschitz continuous which will guarantee uniqueness through the Picard–Lindelöf theorem. Recall that we have  $\forall (s, t) \in [0, 1] \times \mathbb{R}_+$ :

$$\|\psi_\sigma(s, t)\| \leq \frac{1}{2}.$$

Let  $\psi_1, \psi_2$  with  $\|\psi_1(s, t)\| \leq \frac{1}{2}$  and  $\|\psi_2(s, t)\| \leq \frac{1}{2}$  and  $\Pi_1(t), \Pi_2(t)$  the corresponding flows.

Let  $x_0$  in  $\mathbb{R}^d$  with unit norm,  $x_1$  (resp.  $x_2$ ) be the solutions of  $\frac{dx}{ds} = \psi_1(s, t)x(s)$  (resp.  $\frac{dx}{ds} = \psi_2(s, t)x(s)$ ) with initial condition  $x_0$ . Let  $y = x_1 - x_2$ .

One has  $\Pi_1(t)x_0 = x_1(1)$  and  $\Pi_2(t)x_0 = x_2(1)$ . One has  $\dot{y} = \psi_1 x_1 - \psi_2 x_2 = \psi_2 y + (\psi_1 - \psi_2)x_1$ . Hence, since  $y(0) = 0$ ,  $\|y(s)\| \leq \int_0^s \|\psi_2\| \|y\| + \|\psi_1 - \psi_2\|_\infty \|x_1\|_\infty$ , we have

$$\|y(s)\| \leq \frac{1}{2} \|y(s)\| + \|\psi_1 - \psi_2\|_\infty \cdot \|\Pi_1(t)\|$$

and since  $\forall t \in \mathbb{R}_+$ ,  $\|\Pi_1(t)\| \leq 2e$  we get

$$\|\Pi_1(t)x_0 - \Pi_2(t)x_0\| = \|y(1)\| \leq \alpha \|\psi_1 - \psi_2\|_\infty$$

for some  $\alpha > 0$ . The same arguments go for  $\Pi_{\cdot, s}$  and  $\Pi_{s, \cdot}$ .

Since we only consider maps  $\psi_\sigma$  such that  $\|\psi_\sigma(s, t)\| \leq \frac{1}{2}$ , this implies that the product is also Lipschitz and thus  $F$  is Lipschitz. This guarantees the uniqueness of a solution  $\psi$  to the Cauchy problem and we have that  $\psi_N \rightarrow \psi$  uniformly.

2) We now turn to the convergence speed.

We have  $\|\psi_{2N} - \psi_N\| \leq \frac{D}{N}$  for some  $D > 0$  thanks to lemma 2. For  $k \in \mathbb{N}$ , we have that

$$\|\psi_{2^k N} - \psi_N\| \leq \sum_{i=0}^{k-1} \|\psi_{2^{i+1}N} - \psi_{2^i N}\| \leq \frac{D}{N} \sum_{i=0}^{k-1} \frac{1}{2^i} \leq \frac{2D}{N}.$$

Letting  $k \rightarrow \infty$  finally gives  $\|\psi - \psi_N\| \leq \frac{2D}{N}$ .

□

## A.6 Proof of Prop. 3

*Proof.* We denote  $r_n = \tilde{x}_n - x_n$ .

One has  $r_N = 0$  and

$$r_n = \tilde{x}_{n+1} - \frac{1}{N} f(\tilde{x}_{n+1}, \theta_n^N) - x_{n+1} + \frac{1}{N} f(x_n, \theta_n^N),$$

that is

$$r_n = r_{n+1} + \frac{1}{N} (f(x_{n+1} - \frac{1}{N} f(x_n, \theta_n^N), \theta_n^N) - f(\tilde{x}_{n+1}, \theta_n^N)).$$

Since

$$f(x_{n+1} - \frac{1}{N} f(x_n, \theta_n^N), \theta_n^N) = f(x_{n+1}, \theta_n^N) - \frac{1}{N} \partial_x f(x_{n+1}, \theta_n^N) [f(x_n, \theta_n^N)] + O(\frac{1}{N^2})$$

this gives

$$r_n = r_{n+1} + \frac{1}{N} (f(x_{n+1}, \theta_n^N) - f(\tilde{x}_{n+1}, \theta_n^N)) - \frac{1}{N^2} \partial_x f(x_{n+1}, \theta_n^N) [f(x_n, \theta_n^N)] + O(\frac{1}{N^3}).$$

Denoting

$$K_N = \sup_{n \in [N-1]} \|\partial_x f(\cdot, \theta_n^N)\|_\infty^K \|f(\cdot, \theta_n^N)\|_\infty^K,$$

we have the following inequality:

$$\|r_n\| \leq (1 + \frac{L_f}{N}) \|r_{n+1}\| + \frac{1}{N^2} K_N + O(\frac{1}{N^3})$$

and since  $r_N = 0$ , the discrete Gronwall lemma leads to  $\|r_n\| \leq \frac{e^{L_f} - 1}{L_f N} K_N + O(\frac{1}{N^2})$ . In addition, one has  $K_N \leq L_f C_f$  so that

$$\|r_n\| \leq \frac{e^{L_f} - 1}{N} C_f + O(\frac{1}{N^2}).$$

□

### A.7 Proof of Prop. 4

*Proof.* 1) We first control the error made in the gradient with respect to activations.

Denote

$$g_n = \nabla_{\tilde{x}_n} L - \nabla_{x_n} L.$$

One has using formulas (3) and (7) that

$$g_n = g_{n+1} + \frac{1}{N} (\partial_x f(\tilde{x}_n, \theta_n^N) - \partial_x f(x_n, \theta_n^N))^\top \nabla_{\tilde{x}_{n+1}} L + \frac{1}{N} \partial_x f(x_n, \theta_n^N)^\top g_{n+1}.$$

Since

$$\|\partial_x f(x_n, \theta_n^N)^\top g_{n+1}\| \leq L_f \|g_{n+1}\|$$

and because

$$\|(\partial_x f(\tilde{x}_n, \theta_n^N) - \partial_x f(x_n, \theta_n^N))^\top \nabla_{\tilde{x}_{n+1}} L\| \leq L_{df} \|\tilde{x}_n - x_n\| g,$$

where  $g$  is a bound on  $\nabla_{\tilde{x}_{n+1}} L$ , we conclude by using Prop. 3 and the discrete Gronwall's lemma.

2) We can now control the gradients with respect to the parameters  $\theta_n^N$ 's.

Denote

$$t_n = \tilde{\nabla}_{\theta_n^N} L - \nabla_{\theta_n^N} L.$$

We have

$$N t_n = -[\partial_\theta f(x_n, \theta_n^N) - \partial_\theta f(\tilde{x}_n, \theta_n^N)]^\top \nabla_{x_n} L - [\partial_\theta f(\tilde{x}_n, \theta_n^N)]^\top g_n.$$

Hence  $N \|t_n\| \leq L_\theta \|x_n - \tilde{x}_n\| g + C_\theta \|g_n\|$  where  $g$  is a bound on  $\nabla_{x_n} L$ .

Using our bound on  $\|g_n\|$  and Prop. 3 we get

$$N \|t_n\| \leq \frac{L_\theta (e^{L_f} - 1) g C_f}{N} + \frac{(e^{L_f} - 1) (e^{L_f} - 1) C_f L_{df} g C_\theta}{L_f N} + O\left(\frac{1}{N^2}\right)$$

and thus

$$t_n = O\left(\frac{1}{N^2}\right).$$

□

### A.8 Proof of Prop. 5

In the following, we let for short  $f_n(x) = f(x, \theta_n^N)$ , and we define

$$\varphi_n(x) = \frac{1}{2} \left( f_n(x) + f_{n+1}\left(x + \frac{1}{N} f_n(x)\right) \right) \text{ and } \psi_n(x) = \frac{1}{2} \left( f_{n+1}(x) + f_n\left(x - \frac{1}{N} f_{n+1}(x)\right) \right) \quad (12)$$

so that Heun's forward and backward equations are

$$x_{n+1} = x_n + \frac{1}{N} \varphi_n(x_n) \text{ and } \tilde{x}_n = \tilde{x}_{n+1} - \frac{1}{N} \psi_n(\tilde{x}_{n+1}).$$

We have the following lemma that quantifies the reconstruction error over one iteration:

**Lemma 4.** *For  $x \in \mathbb{R}$ , we have as  $N$  goes to infinity*

$$\psi_n\left(x + \frac{1}{N} \varphi_n(x)\right) - \varphi_n(x) = \frac{1}{4N} (J_{n+1}(x) - J_n(x)) [f_{n+1}(x) - f_n(x)] + O\left(\frac{1}{N^2}\right),$$

where  $J_n = \partial_x f_n(x)$  is the Jacobian of  $f_n$ .

*Proof.* As  $N$  goes to infinity, we have the following expansions of (12):

$$\varphi_n(x) = \frac{1}{2} (f_n(x) + f_{n+1}(x)) + \frac{1}{2N} J_{n+1}(x) [f_n(x)] + O\left(\frac{1}{N^2}\right),$$

$$\psi_n(x) = \frac{1}{2} (f_n(x) + f_{n+1}(x)) - \frac{1}{2N} J_n(x) [f_{n+1}(x)] + O\left(\frac{1}{N^2}\right).$$

As a consequence, we have

$$\begin{aligned}\psi_n(x + \frac{1}{N}\varphi_n(x)) &= \frac{1}{2}(f_n(x) + f_{n+1}(x)) - \frac{1}{2N}J_n(x)[f_{n+1}(x)] \\ &\quad + \frac{1}{4N}(J_n(x)[f_n(x) + f_{n+1}(x)] + J_{n+1}(x)[f_n(x) + f_{n+1}(x)]) + O(\frac{1}{N^2}).\end{aligned}$$

Putting everything together, we find that the zero-th order in  $\psi_n(x + \frac{1}{N}\varphi_n(x)) - \varphi_n(x)$  cancels, and that the first order simplifies to  $\frac{1}{4N}(J_{n+1}(x) - J_n(x))[f_{n+1}(x) - f_n(x)]$ .  $\square$

We now turn the the proof of the main proposition:

*Proof.* We let  $r_n = \tilde{x}_n - x_n$  the reconstruction error. We have  $r_N = 0$ , and we find

$$r_n = \tilde{x}_n - x_n \tag{13}$$

$$= \tilde{x}_{n+1} - \frac{1}{N}\psi_n(\tilde{x}_{n+1}) - x_{n+1} + \frac{1}{N}\varphi_n(x_n) \tag{14}$$

$$= r_{n+1} - \frac{1}{N}(\psi_n(\tilde{x}_{n+1}) - \psi_n(x_{n+1})) - \frac{1}{N}(\psi_n(x_{n+1}) - \varphi_n(x_n)). \tag{15}$$

Using the triangle inequality, and the  $L'_f$ -Lispchitz continuity of  $\psi_n$ , we get

$$\|r_n\| \leq (1 + \frac{L'_f}{N})\|r_{n+1}\| + \frac{1}{N}\|\psi_n(x_{n+1}) - \varphi_n(x_n)\|.$$

The last term is controlled with the previous Lemma 4:

$$\|\psi_n(x_{n+1}) - \varphi_n(x_n)\| \leq \frac{1}{4N}\|(J_{n+1}(x_n) - J_n(x_n))[f_{n+1}(x_n) - f_n(x_n)]\| + O(\frac{1}{N^2}) \tag{16}$$

$$\leq \frac{C'_f\Delta_\theta^N}{N} + O(\frac{1}{N^2}). \tag{17}$$

We therefore get the recursion

$$\|r_n\| \leq (1 + \frac{L'_f}{N})\|r_{n+1}\| + \frac{C'_f\Delta_\theta^N}{N^2} + O(\frac{1}{N^3}).$$

Unrolling the recursion gives,

$$\|r_n\| \leq \frac{(e^{L'_f} - 1)C'_f}{L'_f N} \Delta_\theta^N + O(\frac{1}{N^2}).$$

$\square$

## A.9 Proof of Prop. 6

*Proof.* 1) We first control the error made in the gradient with respect to activations. We have the following recursions:

$$\nabla_{x_n} L = (I + \frac{1}{N}\partial_x \varphi_n(x_{n+1}))^\top \nabla_{x_{n+1}} L \text{ and } \nabla_{\tilde{x}_n} L = (I + \frac{1}{N}\partial_x \varphi_n(\tilde{x}_{n+1}))^\top \nabla_{\tilde{x}_{n+1}} L$$

Letting  $r'_n = \nabla_{x_n} L - \nabla_{\tilde{x}_n} L$ , we have

$$r'_n = r'_{n+1} + \frac{1}{N}\partial_x \varphi_n(x_{n+1})^\top r'_{n+1} + \frac{1}{N}(\partial_x \varphi_n(x_{n+1}) - \partial_x \varphi_n(\tilde{x}_{n+1}))^\top \nabla_{\tilde{x}_{n+1}} L$$

Therefore, using the triangle inequality, and letting  $g$  a bound on the norm of the gradients  $\nabla_{\tilde{x}_{n+1}} L$  and  $\Delta$  a Lipschitz constant of  $\partial_x \varphi_n$ , we find

$$\|r'_n\| \leq (1 + \frac{L'_f}{N})\|r'_{n+1}\| + \frac{1}{N}g\Delta\|x_{n+1} - \tilde{x}_{n+1}\|$$

The last term is controlled with the previous proposition, and we find

$$\|r'_n\| \leq \left(1 + \frac{L'_f}{N}\right) \|r'_{n+1}\| + \frac{(e^{L'_f} - 1)C'_f g \Delta}{L'_f N^2} \Delta_\theta^N + O\left(\frac{1}{N^3}\right),$$

which gives by unrolling:

$$\|r'_n\| \leq \frac{(e^{L'_f} - 1)^2 C'_f g \Delta}{L'_f N} \Delta_\theta^N + O\left(\frac{1}{N^2}\right).$$

2) We can now control the gradients with respect to parameters. Since Heun's method involves parameters  $\theta_n^N$  both for the computation of  $x_n$  and  $x_{n+1}$ , the gradient formula is slightly more complicated than for the classical ResNet. It is the sum of two terms, the first one  $\nabla_{\theta_n^N}^1 L$  corresponding to iteration  $n$  and the second one  $\nabla_{\theta_n^N}^2 L$  corresponding to iteration  $n - 1$ .

We have

$$\nabla_{\theta_n^N}^1 L = \frac{1}{2N} \left( \partial_\theta f(x_n, \theta_n^N) + \frac{1}{N} \partial_x f(y_n, \theta_{n+1}^N) \partial_\theta f(x_n, \theta_n^N) \right)^\top \nabla_{x_n} L$$

and

$$\nabla_{\theta_n^N}^2 L = \frac{1}{2N} (\partial_\theta f(y_{n-1}, \theta_{n-1}^N))^\top \left( I + \frac{1}{N} \partial_x f(x_{n-1}, \theta_{n-1}^N) \right)^\top \nabla_{x_{n-1}} L.$$

The gradient  $\nabla_{\theta_n^N} L$  is finally

$$\nabla_{\theta_n^N} L = \nabla_{\theta_n^N}^1 L + \nabla_{\theta_n^N}^2 L.$$

Overall, these equations map the activations  $x_n$  and  $x_{n-1}$ , and the gradients  $\nabla_{x_{n-1}} L$  and  $\nabla_{x_n} L$  to the gradient  $\nabla_{\theta_n^N}$ , which we rewrite as

$$\nabla_{\theta_n^N} L = \Psi(x_n, x_{n-1}, \nabla_{x_n} L, \nabla_{x_{n-1}} L),$$

where the function  $\Psi$  is explicitly defined by the above equations. With the memory-free backward pass, the gradient is rather estimated as

$$\tilde{\nabla}_{\theta_n^N} L = \Psi(\tilde{x}_n, \tilde{x}_{n-1}, \nabla_{\tilde{x}_n} L, \nabla_{\tilde{x}_{n-1}} L).$$

The function  $\Psi$  is Lipschitz-continuous since all functions involved in its composition are Lipschitz-continuous and the activations belong to a compact set, and its Lipschitz constant scales as  $\frac{1}{N}$ . We write its Lipschitz constant as  $\frac{L_\Psi}{N}$ , and we get:

$$\|\nabla_{\theta_n^N} L - \tilde{\nabla}_{\theta_n^N} L\| = \|\Psi(x_n, x_{n-1}, \nabla_{x_n} L, \nabla_{x_{n-1}} L) - \Psi(\tilde{x}_n, \tilde{x}_{n-1}, \nabla_{\tilde{x}_n} L, \nabla_{\tilde{x}_{n-1}} L)\| \quad (18)$$

$$\leq \frac{L_\Psi}{N} (\|x_n - \tilde{x}_n\| + \|x_{n-1} - \tilde{x}_{n-1}\| + \|\nabla_{x_n} L - \nabla_{\tilde{x}_n} L\| + \|\nabla_{x_{n-1}} L - \nabla_{\tilde{x}_{n-1}} L\|). \quad (19)$$

Using the previous propositions, we get:

$$\|\nabla_{\theta_n^N} L - \tilde{\nabla}_{\theta_n^N} L\| = O\left(\frac{\Delta_\theta^N}{N^2} + \frac{1}{N^3}\right).$$

□

## B Experimental details

In all our experiments, we use Nvidia Tesla V100 GPUs.

## B.1 CIFAR

For our experiments on CIFAR-10 (training from scratch), we used a batch-size of 128 and we employed SGD with a momentum of 0.9. The training was done over 200 epochs. The initial learning rate was 0.1 and we used a cosine learning rate scheduler. A constant weight decay was set to  $5 \times 10^{-4}$ . Standard inputs preprocessing as proposed in Pytorch [33] was performed.

For our finetuning experiment on CIFAR-10, we used a batch-size of 128 and we employed SGD with a momentum of 0.9. The training was done over 5 epochs. The learning rate was kept constant to  $10^{-3}$ . A constant weight decay was set to  $5 \times 10^{-4}$ . Standard inputs preprocessing as proposed in Pytorch was also performed.

For our experiment with our simple ResNet model that processes the input by a  $5 \times 5$  convolution with 16 out channels, we used a batch-size of 256 and we employed SGD with a momentum of 0.9. The training was done over 90 epochs. The learning rate was set to  $10^{-1}$  and was decayed by a factor 10 every 30 epochs. A constant weight decay was set to  $5 \times 10^{-4}$ . Standard inputs preprocessing as proposed in Pytorch was also performed.

## B.2 ImageNet

For our experiments on ImageNet (training from scratch), we used a batch-size of 256 and we employed SGD with a momentum of 0.9. The training was done over 100 epochs. The initial learning rate was 0.1 and was decayed by a factor 10 every 30 epochs. A constant weight decay was set to  $10^{-4}$ . Standard inputs preprocessing as proposed in Pytorch was performed: normalization, random cropping of size  $224 \times 224$  pixels, random horizontal flip.

For our finetuning experiment on ImageNet, we used a batch-size of 256 and we employed SGD with a momentum of 0.9. The training was done over 3 epochs. The learning rate was kept constant to  $5 \times 10^{-4}$ . A constant weight decay was set to  $10^{-4}$ . Standard inputs preprocessing as proposed in Pytorch was performed: normalization, random cropping of size  $224 \times 224$  pixels, random horizontal flip.

## C Architecture details

In computer vision, the ResNet as presented in [20] first applies non residual transformations to the input image: a feature extension convolution that goes from 3 channels to 64, a batch norm, a non-linearity (ReLU) and optionally a maxpooling.

It is then made of 4 layers (each layer is a series of residual blocks) of various depth, all of which perform residual connections. Each of the 4 layers works at different scales (with an input with a different number of channels): typically 64, 128, 256 and 512 respectively. There are two types of residual blocks: Basic Blocks and Bottlenecks. Both are made of a succession of convolutions conv, batch normalizations bn [22] and ReLU non-linearity  $\sigma$ . For example, a Basic Block iterates (in a pre-activation [21] fashion):

$$x \rightarrow x + \text{bn}(\text{conv}(\sigma(\text{bn}(\text{conv}(\sigma(x)))))$$

Finally, there is a classification module: average pooling followed by a fully connected layer.
